# Mating-induced Male Death and Pheromone Toxin-regulated Androstasis

Cheng Shi, Alexi M. Runnels, and Coleen T. Murphy\*

Lewis-Sigler Institute for Integrative Genomics and Dept. of Molecular Biology, Princeton University, Princeton, NJ 08544, USA

\*Correspondence to: [ctmurphy@princeton.edu](mailto:ctmurphy@princeton.edu)

## Abstract

How mating affects male lifespan is poorly understood. Using single worm lifespan assays, we discovered that males live significantly shorter after mating in both androdioecious (male and hermaphroditic) and gonochoristic (male and female) *Caenorhabditis*. Germline-dependent shrinking, glycogen loss, and ectopic expression of vitellogenins contribute to male post-mating lifespan reduction, which is conserved between the sexes. In addition to mating-induced lifespan decrease, worms are subject to killing by male pheromone-dependent toxicity. *C. elegans* males are the most sensitive, whereas *C. remanei* are immune, suggesting that males in androdioecious and gonochoristic species utilize male pheromone differently as a toxin or a chemical messenger. Our study reveals two mechanisms involved in male lifespan regulation: germline-dependent shrinking and death is the result of an unavoidable cost of reproduction and is evolutionarily conserved, whereas male pheromone-mediated killing provides a novel mechanism to cull the male population and ensure a return to the self-reproduction mode in androdioecious species. Our work highlights the importance of understanding the shared vs. sex- and species-specific mechanisms that regulate lifespan.

**Keywords:** *Caenorhabditis*, mating, pheromone, death

## Introduction

The interplay between the sexes influences an individual's longevity<sup>1-3</sup>. *Caenorhabditis* female lifespan is shortened after mating through receipt of male sperm and seminal fluid<sup>4</sup>, and separately by exposure to male pheromone<sup>5</sup>. However, previous studies reported contradictory results on how mating influences male lifespan<sup>3,6</sup>. Therefore, whether and how male lifespan is affected by prolonged exposure and interactions with females is largely unknown.

The *Caenorhabditis* genus consists of both androdioecious (male and hermaphroditic) and gonochoristic (male and female) species. In androdioecious species such as *C. elegans*, the population is dominated by hermaphrodites, which reproduce by self-fertilization. Males are usually very rare (less than 0.2% for the standard lab strain N2) and are produced due to spontaneous X chromosome nondisjunction<sup>7,8</sup>. Under stressful conditions, more oocytes experience chromosome non-disjunction, thus androdioecious species periodically undergo explosions of male populations. The existence of males in androdioecious species may reduce inbreeding and facilitate adaptation to changing environments<sup>9</sup>. By contrast, in gonochoristic species such as

*C. remanei*, 50% of the population is male, and females and males must mate to reproduce. The mating efficiency of *C. elegans* males is very low compared to *C. remanei* males<sup>8</sup>. Gonochoristic species females secrete pheromones that attract males<sup>10</sup>, and have distinct behaviors during mating compared to hermaphrodites<sup>11,12</sup>. How males in androdioecious and gonochoristic species cope with these different mating situations remains poorly understood. Moreover, the utility of killing females by exposure to male pheromone in gonochoristic populations<sup>5</sup> is unclear.

Here we report that after mating, *Caenorhabditis* males suffer from germline-dependent shrinking and death, just as in the case of mated *C. elegans* hermaphrodites and *C. remanei* females<sup>4</sup>. However, *C. elegans* males and hermaphrodites have differential sensitivity to male pheromone-dependent toxicity, while *C. remanei* seem immune to this toxicity, and instead use sex-specific pheromones to identify mates. Thus, androdioecious and gonochoristic species differentially utilize pheromone for mating vs hermaphroditic maintenance, while both species suffer the cost of mating through germline-dependent shrinking and death.

## Results

### *C. elegans* males live shorter after mating

*C. elegans* hermaphrodites shrink up to 30% and live 40% shorter after mating<sup>4</sup>. We wondered if males also experience such extreme post-mating changes. Traditional lifespan assays are performed using grouped worms; however, grouped males live shorter than solitary males<sup>13</sup>, which could mask the lifespan shortening effect of mating in males. Therefore, we measured the lifespans of solitary males and single males paired with a single hermaphrodite for 6 days from Day 1 to Day 6 of adulthood. (We used *fog-2(q71)* worms in our assay; *fog-2* males are equivalent to wild-type (N2) males, while *fog-2* hermaphrodites are self-spermless<sup>4</sup>, enabling identification of successful mating.) Mated male lifespan was decreased

~35% compared with the unmated solitary males (Fig. 1A, Table S1), similar to the lifespan decrease of mated hermaphrodites<sup>4</sup>. Also like females, males shrank after 6 days' mating; by Day 7, the mated males were 10% smaller than the unmated solitary males control (Fig. 1B,C, Table S2).

Males die faster when paired with a hermaphrodite for a longer period: mating with a hermaphrodite for one day did not affect the lifespan of the male, while 2-3 days' mating shortened male lifespan by 15%, 4-5 days' mating reduced their lifespan by 25%, and 6 days' mating increased the reduction to over 35% (Fig. 1D). By contrast, the number of hermaphrodites paired with the single male during mating had much less effect compared to mating duration (Fig. 1E, Fig. S1A,B). The time at which mating occurs within the reproductive period is also not critical for males' post-mating

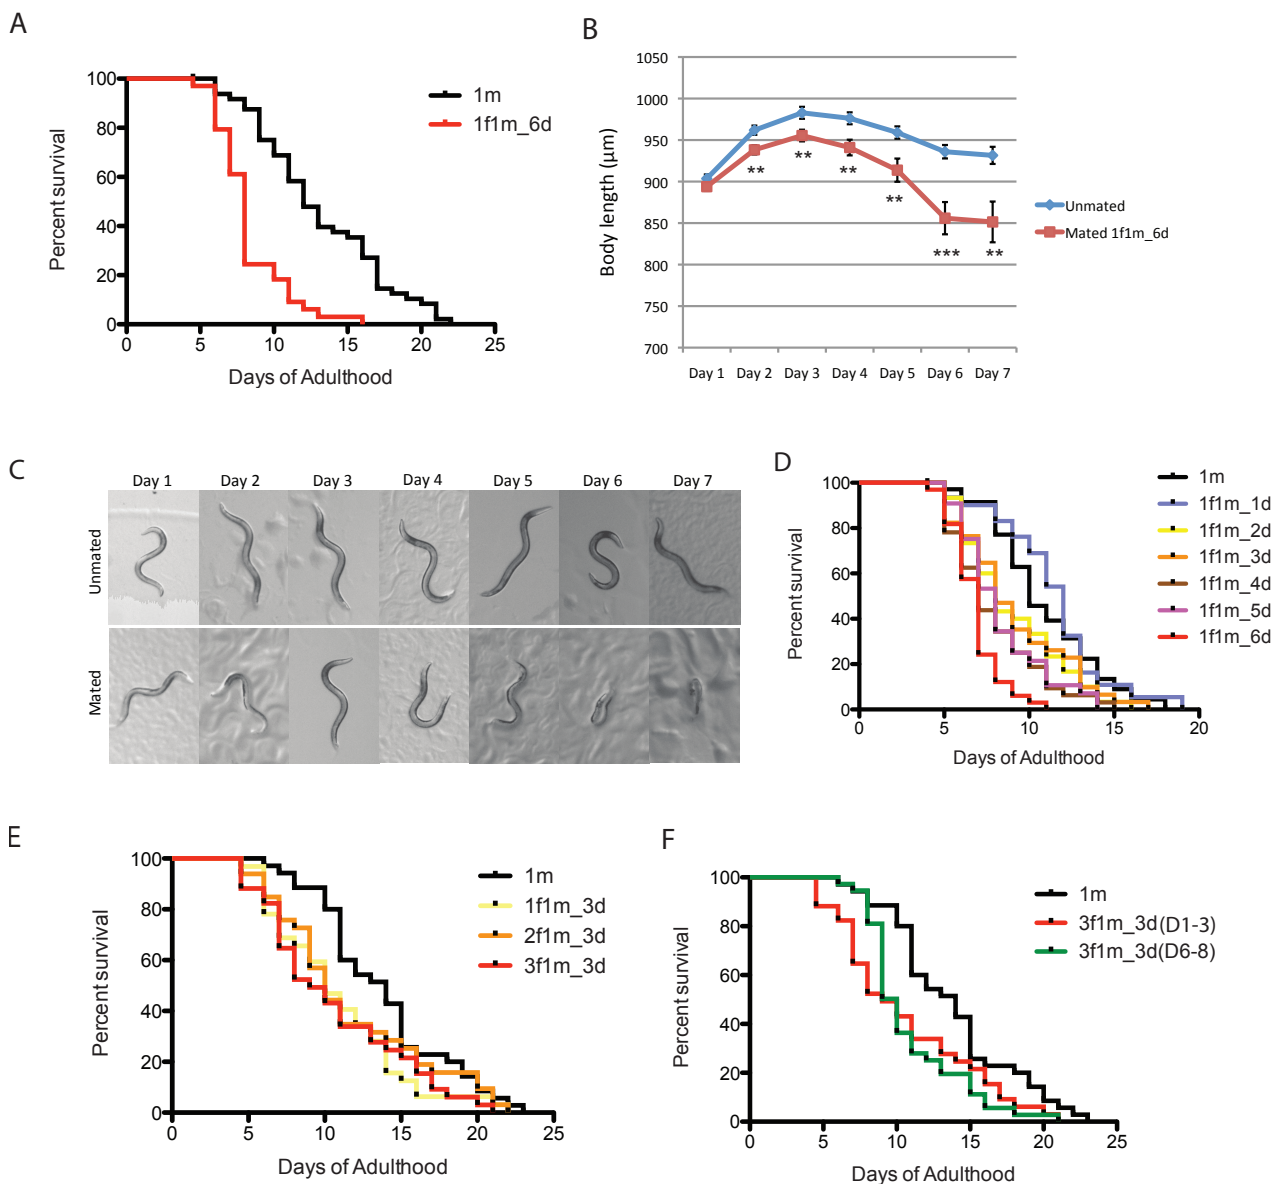

Figure 1. *C. elegans* males shrink and die early after mating.

lifespan decrease; given the same mating duration, males mated with hermaphrodites for the first three days of adulthood had a similar lifespan decrease as those mated with hermaphrodites during Days 6-8 of adulthood (Fig. 1F).

### *C. elegans* males' post-mating shrinking and death are germline-dependent

We wondered whether pheromone is required for mating-induced death in males. To distinguish pheromone from a direct mating effect, we tested *daf-22(m130)* mutants, which are deficient in ascaroside pheromone biogenesis<sup>15</sup>. Wild-type males still died early post-mating when paired with a *daf-22* hermaphrodite for 6 days (Fig. 2A). Likewise, *daf-22* mutant males lived shorter after 6 days' mating (Fig. 2B), indicating that the post-mating lifespan decrease in our single-worm pair lifespan assay is due to mating itself rather than pheromone from either sex.

Elevated germline proliferation is one of the major causes of hermaphrodites' early death after mating<sup>4</sup>. We wondered whether this killing mechanism is conserved in males. Adult treatment with the DNA replication inhibitor 5-fluorodeoxyuridine (FUdR) has little effect on lifespan and meiosis at low dosage (50  $\mu$ M)<sup>16</sup>, but rapidly blocks germline proliferation in mated hermaphrodites<sup>4</sup>. When treated with 50 $\mu$ M FUdR during the three-day mating period, male lifespan was unchanged (Fig. 2C). FUdR treatment also eliminated male post-mating lifespan decrease in our 6 days' mating regime (Fig. S1C,D). Additionally, lacking the germline prevented both shrinking and death: mating caused neither shrinking nor lifespan decrease in germline-less *glp-1(e2141)* males (Fig. 2D,E, Fig. S1E). These results suggest that germline-mediated post-mating lifespan regulation is conserved between sexes to a large extent.

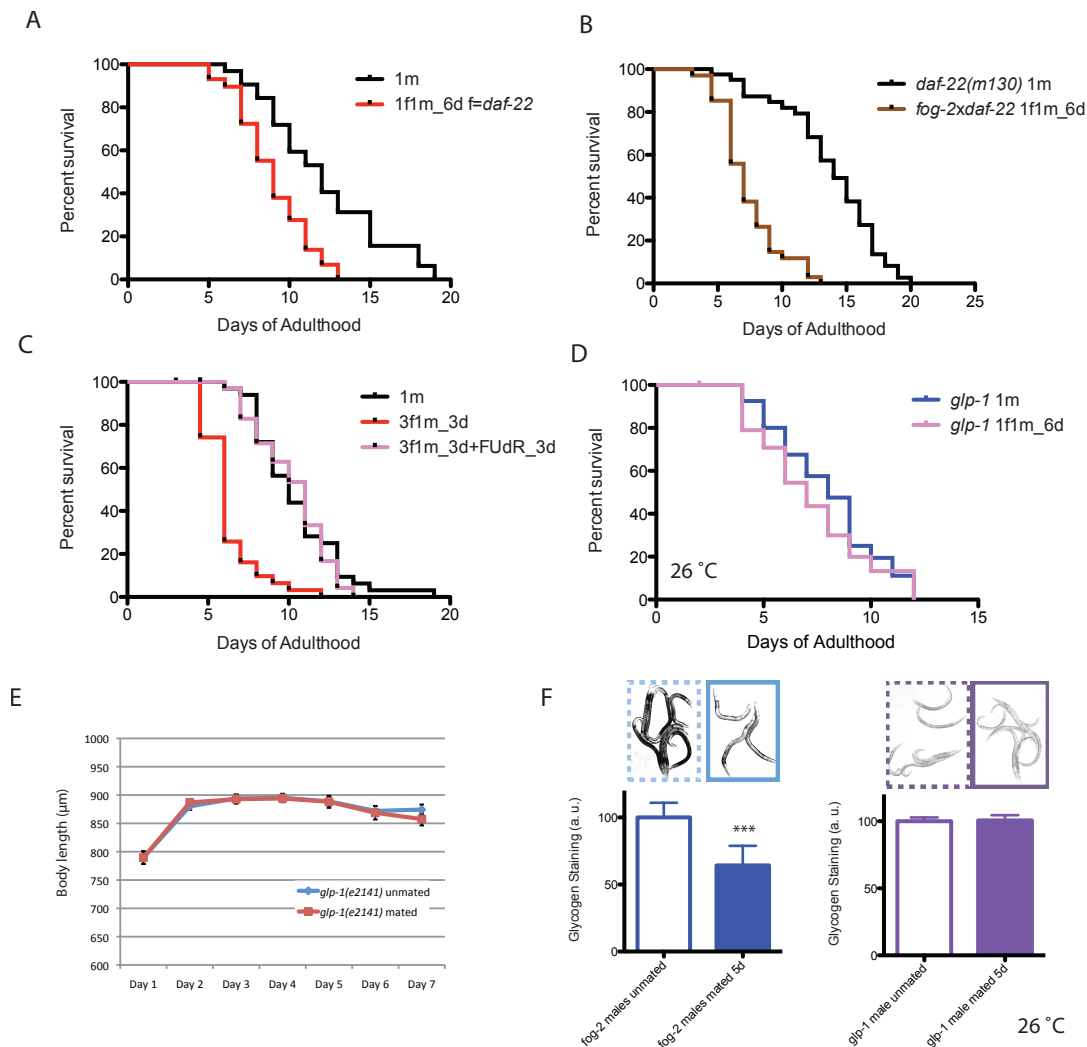

**Figure 2 Male post-mating shrinking death is germline-dependent.**

We have shown previously that osmotic stress resistance correlates well with shrinking in mated hermaphrodites, whereas fat loss does not account for such shrinking<sup>4</sup>. Changes of glycogen levels *in vivo* accurately reflect the osmotic perturbation in the environment<sup>17</sup>; therefore, we measured the glycogen level using iodine staining, and found that mated wild-type worms lost about 30% of the glycogen storage post-mating in a germline-dependent manner (Fig 2F). The mating-induced glycogen storage decrease and subsequent shrinking is conserved between sexes (Fig. S2).

### Vitellogenin dysregulation contributes to male post-mating death

To further characterize male post-mating death, we performed genome-wide transcriptional analysis of mated and unmated males: we paired a single male with a hermaphrodite for 3.5 days of mating, then picked the males individually from the hermaphrodites on Day 4 for microarray analysis (Fig. S3A). As a control, we collected the same number of age-matched solitary males. 14 genes were significantly up-regulated and 41 were significantly down-regulated (FDR=0%; SAM<sup>18</sup>;

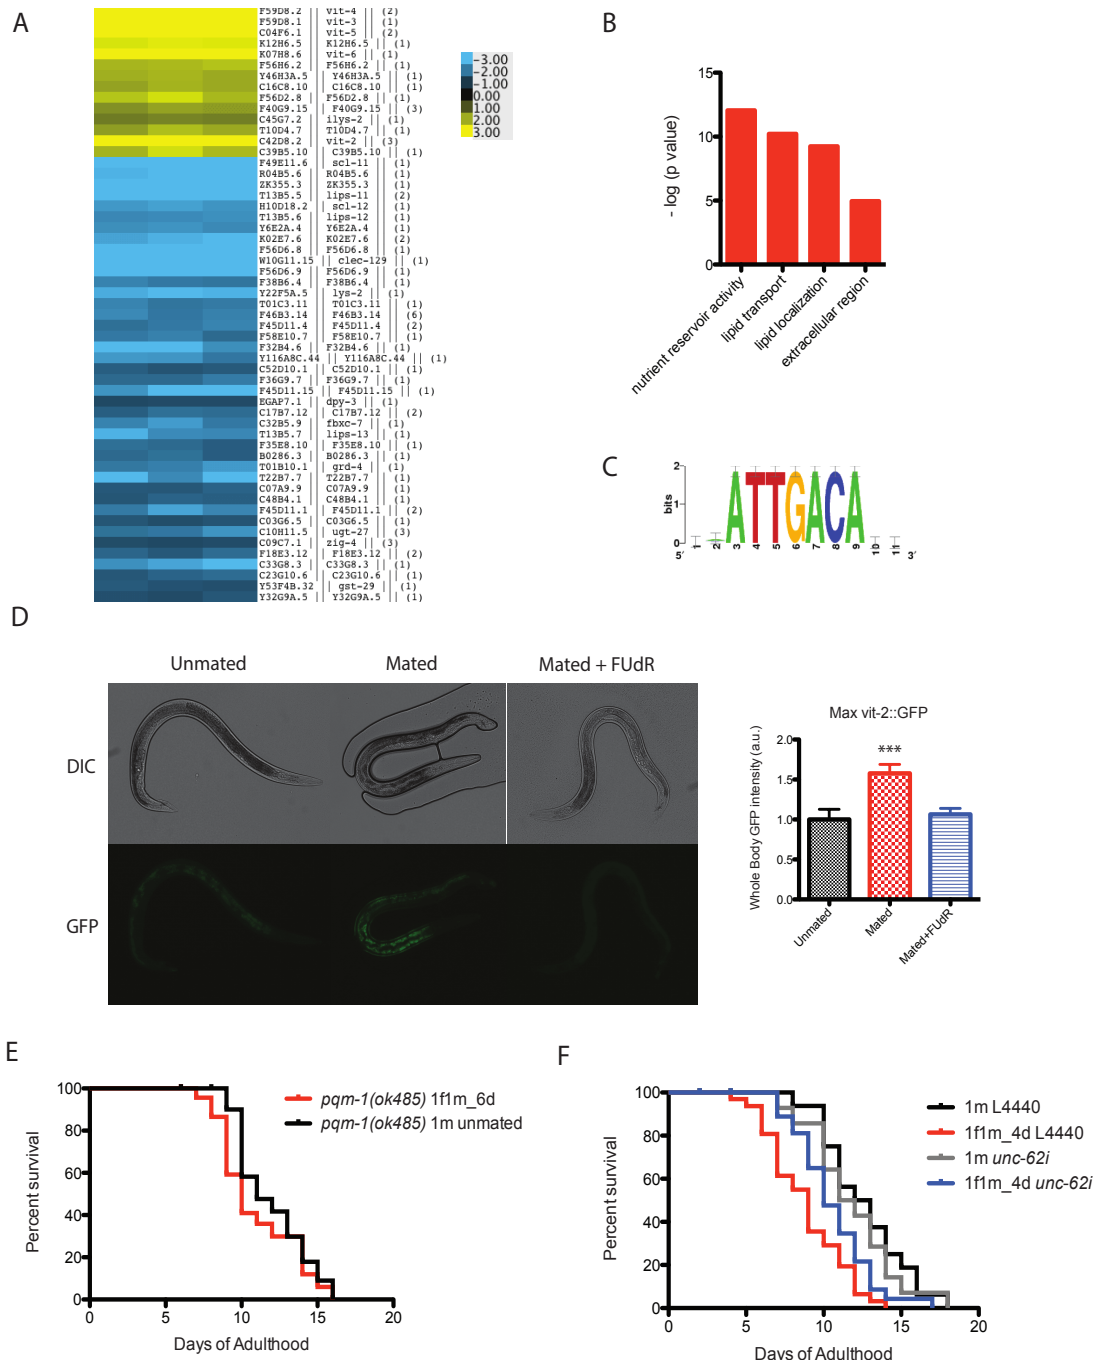

4 **Figure 3** Microarray analysis reveals vitellogenin's role in male post-mating death.

Table S3, Fig. 3A). Genes whose expression decreased in mated males include extracellular proteins (*scl-11*, *scl-12*, *zig-4*) and predicted lipase-related hydrolases (*lips-11*, *lips-12*, *lips-13*). The most enriched gene ontology (GO) categories were ribonucleoside monophosphate biosynthetic/metabolic process and extracellular region for the down-regulated genes, and nutrient reservoir activity and lipid transport for the up-regulated genes (Fig. 3B, Fig. S3B).

Surprisingly, vitellogenins (*vit-4*, *vit-3*, *vit-5*, *vit-6*, *vit-2*), which encode yolk protein precursors made in the female/hermaphrodite intestine for transport into developing oocytes<sup>19</sup>, were the top up-regulated genes in mated males. They were expressed on average 19 times higher in mated males than in solitary unmated males (Table S3). Males normally do not express *vit* genes, as they produce no oocytes. We confirmed our microarray finding using VIT-2::GFP males: mating induced ectopic expression of VIT-2::GFP, especially in the anterior intestine in males. Such overexpression was germline-dependent (Fig. 3D, S3D). Overproduction of vitellogenins is deleterious for hermaphrodites: vitellogenins accumulate in the head and body of older hermaphrodites<sup>20</sup>; long-lived insulin signaling mutants repress *vit* gene expression<sup>21</sup>; and knockdown of the *vit* genes in wild-type hermaphrodites extends lifespan<sup>21</sup>. The DAE (DAF-16 Associated Element) motif is present in most *vit* genes, which are also Class 2 DAF-16 genes<sup>21</sup>. Thus, we tested the function of PQM-1, the DAE-dependent transcription factor<sup>22</sup>, in male post-mating death. Mated *pqm-1(ok485)* knockout males lived as long as the unmated control (Fig. 3E), suggesting it is important for post-mating death. The binding motif for UNC-62, a master transcription regulator of *vit* genes in hermaphrodites<sup>23</sup>, also emerged in unbiased motif analysis (Fig. 3C). Using RNAi, we found that knocking down *unc-62* was sufficient to rescue the lifespan decrease in mated males (Fig. 3F). Thus, the mis-expression of vitellogenins upon mating contributes to post-mating death in males.

### Mating-induced early death in males is evolutionarily conserved within *Caenorhabditis*

Previously, we showed that *C. remanei* females, like *C. elegans* hermaphrodites, also shrink and die faster after mating<sup>4</sup>, suggesting that the mechanisms are evolutionarily conserved in females. Likewise, we found that male *C. remanei* also lived significantly shorter after mating with a female *C. remanei* for 6 days (Fig. 4A). However, while female death requires successful cross-progeny production, as *C. remanei* males do not induce post-mating death of *C. elegans* hermaphrodites<sup>4</sup>, *C. elegans* males died early when mated with a *C. remanei* female for 6 days (Fig. 4B), suggesting that a component of mating specific and autonomous to the male, rather than a transferred substance or pheromone, is responsible for male death in both species.

### Grouped males also have reduced lifespans in *C. elegans* and *C. remanei*

When male *C. elegans* are housed together, they live shorter compared with solitary males<sup>13</sup>, and the death rate increases with the number of males in a dose-dependent manner<sup>13</sup> (Fig. 5A). (This might be the reason a previous report failed to report shortened lifespan of males after mating, because grouped males were used as the control<sup>3</sup>.) *C. elegans* male lifespan is very sensitive to male density: just two males together significantly reduced each individual's lifespan. In a group of eight males, the individual lifespan had a more dramatic 36% decrease compared with the solitary control (Fig. 5A). *C. remanei* male lifespan was also influenced by male density, although to a lesser degree than *C. elegans* males (Fig. 5C). *C. elegans* males tend to form clumps and attempt to mate with each other. By contrast, *C. remanei* males rarely form clumps, having much reduced male-male interaction<sup>13</sup> (Fig. 5A,C insets). We thought such male-male mating attempts might also lead to post-mating lifespan decrease in a germline-dependent manner as we observed in males mated with females. To test this hypothesis, we placed

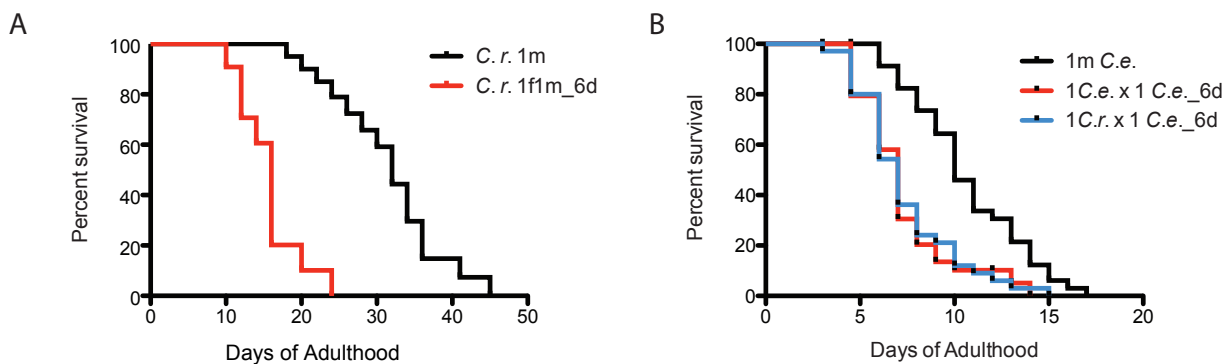

**Figure 4 Mating-induced early death in males is conserved.**

the grouped males and solitary controls on FUdR plates to inhibit germline proliferation. In the presence of FUdR, grouped *C. remanei* males had no lifespan decrease (Fig. 5D). However, grouped *C. elegans* males still lived significantly shorter (11% decrease compared with solitary control,  $p=0.0032$ , Fig. 5B), indicating that a germline-independent factor also contributes to *C. elegans* male lifespan reduction when other males are present.

### Male pheromone-dependent toxicity leads to reduced lifespan in grouped *C. elegans*

It was shown previously that *C. elegans* hermaphrodites can be killed by male pheromone secreted by grouped males<sup>5</sup>. We wondered whether male pheromone also affects male lifespan. We held 8 *daf-22(m130)* (pheromone-less) males together, and found that they lived as long as the solitary wild-type males, suggesting that male pheromone kills males (Fig. 5E). Grouped *daf-22* males lived just slightly shorter than solitary

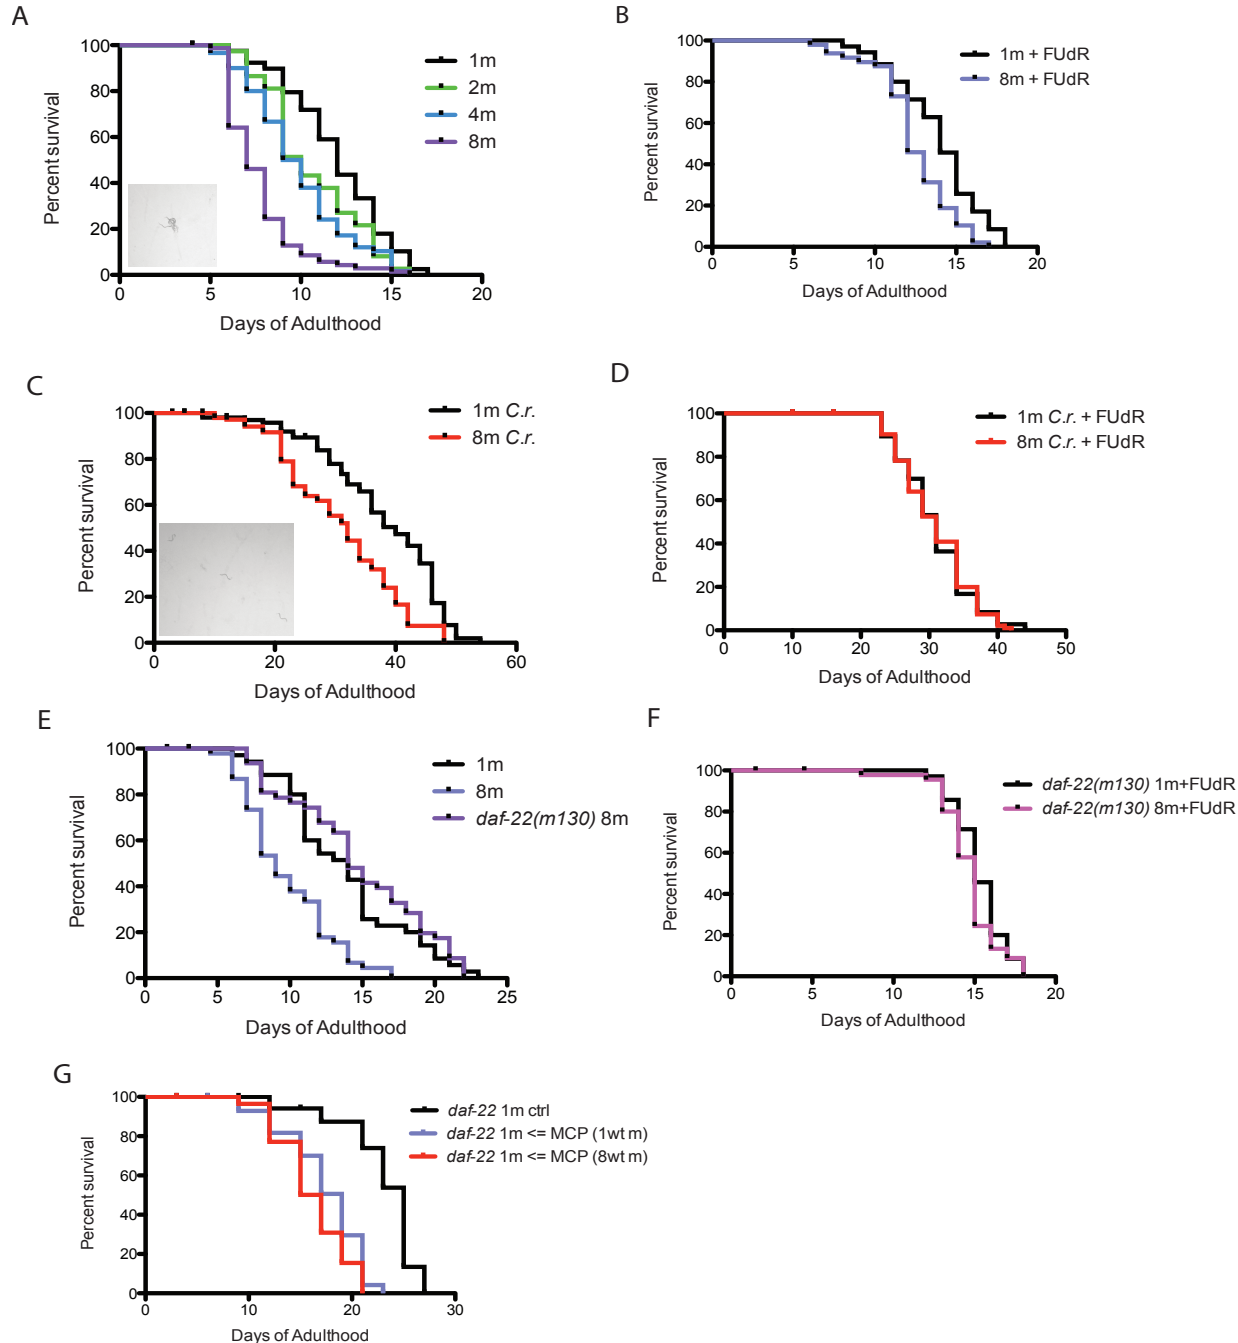

Figure 5 Grouped *C. elegans* males live shorter due to male pheromone.

*daf-22* males (Fig. S4A). The remaining lifespan difference can be explained by germline up-regulation due to mating attempts, since *daf-22* males also formed clumps (Fig. S4A inset), and this lifespan difference was completely eliminated when the experiment was performed in the presence of FUdR (Fig. 5F). Therefore, in grouped *C. elegans* males, early death is due to a combination of germline up-regulation and male pheromone. In fact, males are the victims of their own pheromone: the lifespan of *daf-22* males was significantly reduced when they were maintained on plates conditioned by only one wild-type male (Fig. 5G, S4B), suggesting that *C. elegans* males are extremely sensitive to male pheromone-dependent toxicity.

### *C. elegans* and *C. remanei* have different sensitivity to male pheromone's toxicity

We wondered whether in a true male/female species, male pheromone-mediated death is also present, and if there are cross-species effects. We confirmed that *C. elegans* hermaphrodites die early when grown on plates conditioned with a large number of *C. elegans* males, as shown previously<sup>5</sup> (Fig. 6A, 30 males per plate for conditioning). *C. elegans* hermaphrodites also died early when exposed to *C. remanei* male pheromone (Fig. 6A). By contrast, multiple trials of *C.*

*remanei* females on male-conditioned plates failed to reveal any sensitivity to either *remanei* or *elegans* male pheromone (Fig. 6B). We then tested the sensitivity of both hermaphrodites and males to low levels of pheromone (8 males per plate for conditioning), and found that *C. elegans* hermaphrodites were not as sensitive to male pheromone as males were (Fig. 6C). By contrast, both *C. remanei* males and females were insensitive to low or high amounts of pheromone (Fig. 6D). Thus, *C. elegans* males are most sensitive to male pheromone-dependent toxicity, *C. elegans* hermaphrodites have intermediate sensitivity, and *C. remanei* appear to be immune to male pheromone toxicity (Fig. S5B).

## Discussion

### Germline activation induces deleterious changes that cause males to die

*C. elegans* males and hermaphrodites share many post-mating changes. As we found previously for mated females and hermaphrodites<sup>4</sup>, *Caenorhabditis* males also experience germline-dependent shrinking, glycogen loss, and death after mating. Germline up-regulation also leads to ectopic expression of vitellogenins, which contributes to the post-

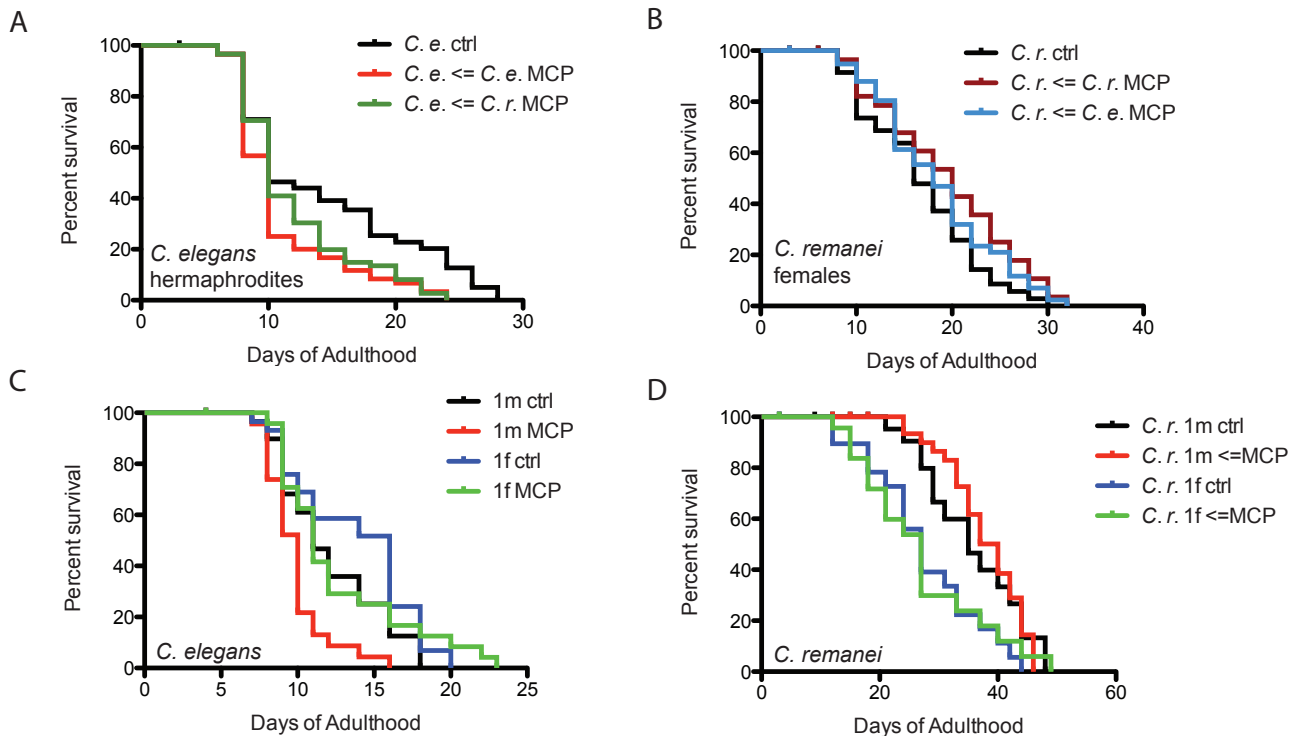

Figure 6 Only *C. elegans* is sensitive to male pheromone's toxicity.

mating lifespan decrease in males. Previously, these yolk protein precursors were only noted to be expressed in hermaphrodites, since males do not produce oocytes, which normally take up vitellogenins in females. Mating also induces significant overexpression of *vit* genes in hermaphrodites<sup>24</sup>, indicating that vitellogenin expression is closely coupled with mating-induced germline up-regulation in both sexes. Such coupling may be strong enough to overcome the repression of male vitellogenin expression. The striking similarity of germline-dependent post-mating changes in *Caenorhabditis* males and females suggests that this mechanism is largely conserved between sexes, and may represent an unavoidable cost of reproduction as a result of mating.

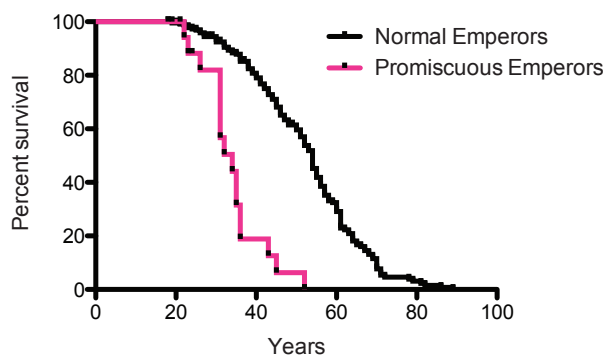

**Figure 7 Average lifespan of Chinese emperors**

Such germline-dependent lifespan shortening appears to be conserved between sexes and across species over large evolutionary distances. Male post-mating death is conserved beyond the *Caenorhabditis* genus, as *Drosophila* males also die earlier after mating<sup>2</sup>. Interestingly, this phenomenon may also be present in human males: in ancient imperial China, those emperors notorious for their lifelong extreme promiscuous sexual behavior lived 35% shorter than their counterparts ( $34 \pm 2$  yrs compared with  $52 \pm 1$  yrs, Fig. 7, Table S4). Limited by the style of historical records in ancient China, other death-contributing factors such as sexually transmitted diseases cannot be ruled out. However, a previous study showed that the lifespan of Korean eunuchs was significantly longer than the lifespan of non-castrated men with similar socio-economic status<sup>25</sup>. Together, these results suggest that some aspects of germline-dependent male post-mating death may be evolutionarily conserved.

### Male pheromone-induced killing as a strategy to selectively reduce the male population

In addition to the mating-induced lifespan decrease, *C. elegans* are subject to killing by male pheromone-dependent toxicity, while *C. remanei* are not. Our study shows that androdioecious and gonochoristic species have different

sensitivities to male pheromone. The androdioecious species (*C. elegans*) males do not appear to use pheromones as efficiently as chemical messengers to facilitate mating, since they are less able to distinguish hermaphrodites' pheromone from other species' female or male pheromone; in fact, *C. elegans* males are even slightly attracted to their own male pheromone, in part explaining their clumping<sup>10</sup> (Fig. S5A). On the other hand, male pheromone is very toxic to *C. elegans* males. Thus, to *C. elegans* males, pheromones serve primarily as toxins to kill males. By contrast, *C. remanei* (gonochoristic species) males are extremely attracted by pheromone produced by *C. remanei* females, even at a low concentration, and are slightly repelled by male pheromone<sup>10</sup> (Fig. S5A), but *C. remanei* are immune to both *elegans* and *remanei* male pheromone toxicity (Fig. 6B,D). Thus, the gonochoristic species *C. remanei* uses pheromones primarily as chemical messengers to locate mates. It is also worth noting that such female pheromone-mediated attraction is completely abolished in the presence of male sperm<sup>10</sup>. In *C. elegans*, males are attracted to old, self-spermless hermaphrodites<sup>26,27</sup>, suggesting that pheromone retains the function as a chemical messenger under some circumstances in *C. elegans*. However, due to the presence of self-sperm in the hermaphrodites, *C. elegans* males do not use pheromone as a primary tool to seek young and middle-aged hermaphrodites.

*Caenorhabditis* species might utilize pheromones in such different ways due to their different modes of reproduction. In the androdioecious species *C. elegans*, males are normally rare (0.2%), so the chance that any worm he encounters will be a hermaphrodite is very high; thus, there may be less selection pressure to evolve pheromones as chemical messengers to seek out mates. However, periodically there are explosions of male populations in androdioecious species (e.g., under stressful conditions) to allow outcrossing and ensure genetic diversity<sup>9</sup>. After this period, however, males are more costly to maintain, and there is pressure to return to a primarily hermaphroditic population. It is notable that because *C. elegans* males are XO, rather than XY, males may have no selfish drive to maintain their own chromosomes. From the perspective of species, using male pheromone as a dose-dependent toxin may be an effective way to cull the male population and ensure the species returns to the self-reproduction mode when the stressful condition has passed. Use of the pheromone as a toxin to kill males may have arisen to aid the return to hermaphroditism, which can also be promoted by increased hermaphroditic progeny production and decreased mating rates<sup>28</sup>; these factors could also act in tandem with the selected pheromone-dependent killing of males. Hermaphrodite death at high male pheromone concentration (which would happen extremely rarely in nature) might simply be a rather infrequent result of collateral damage, as the hermaphrodites are less sensitive than males to the toxin. Male-specific culling also occurs in species such as *Drosophila bifasciata*, in which *Wolbachia* infection leads to the killing of male embryos, suggesting that sex ratio can be



controlled through male-killing<sup>29</sup>. Mathematical modeling shows that selection in *C. elegans* favors low populations of males<sup>30</sup>, and our model provides a mechanism for how this may be achieved.

By contrast, the preponderance of males in a 50:50 population, as in the case of *C. remanei*, makes the use of pheromone as a toxin less likely, as it would cause too much off-target death to be useful for sperm competition. Our cross-species results suggest that *remanei* male pheromone is toxic to *C. elegans*, but both *C. remanei* males and females are immune to both *elegans* and *remanei* pheromone (Fig. 6A,B). These results also suggest that the toxic effect of pheromone may not be due to the pheromone itself, but rather to a receptor-mediated sensitivity to pheromone that is specific to *C. elegans*, with a greater effect in males than in hermaphrodites. Instead, *C. remanei* pheromone is used to distinguish males from females, an important distinction in 50:50 mixed populations. Like *C.*

*elegans*, the primary mode of sperm competition in *C. remanei* appears to involve seminal fluid transfer of factors that cause the mother to die after producing the father's progeny, before she has a chance to re-mate<sup>4</sup>, rather than through a pheromone-based mechanism (Fig. 8).

In summary, germline-dependent early death after mating is conserved between sexes and perhaps even across great evolutionary distances, and is likely due to an unavoidable cost of mating, the result of mated animals ramping up germline proliferation and subsequently exhausting using their own resources as fast as possible to produce the next generation of progeny. The differential use of pheromones as toxins or chemical messengers by males in androdioecious and gonochoristic species demonstrates that they adopt different strategies to compete, mate, and maintain optimal population ratios.

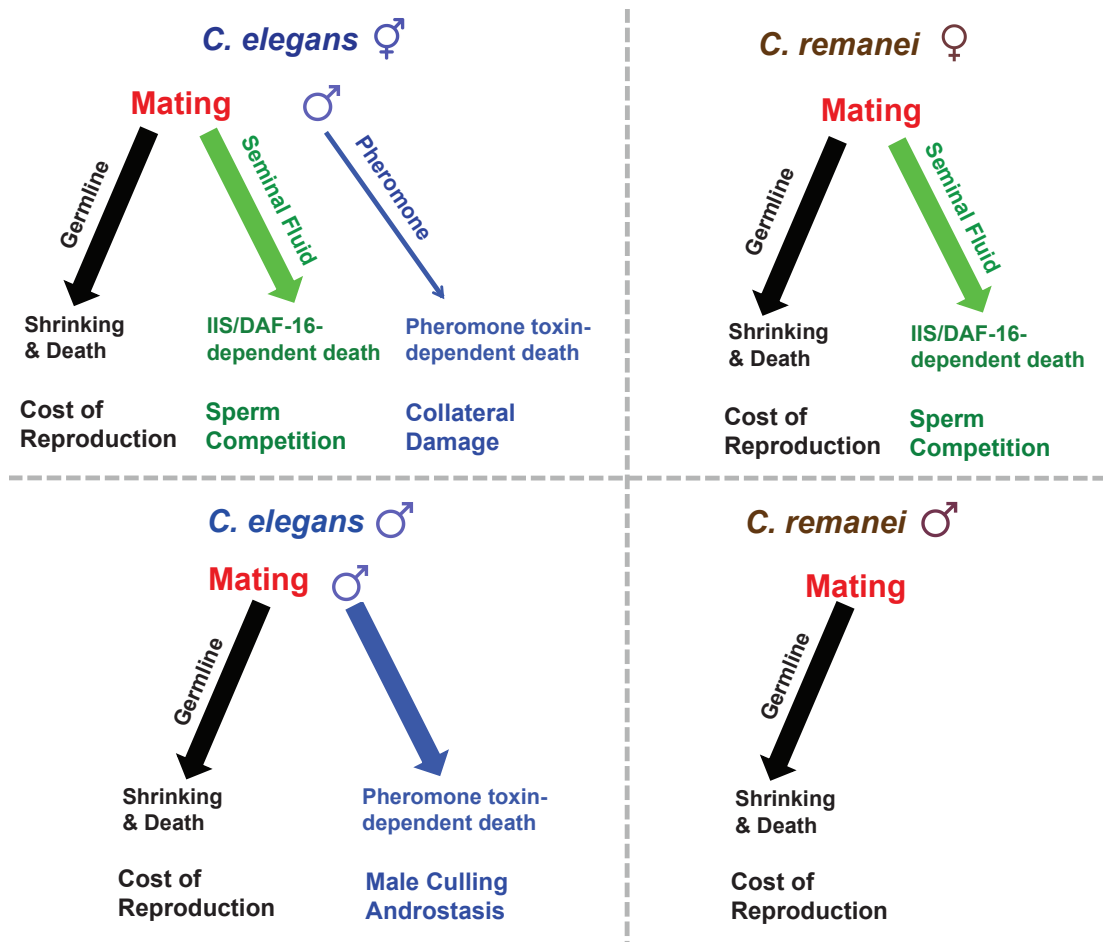

Figure 8 Simplified model of how mating and male pheromone affect lifespan in *C. elegans* hermaphrodites (upper left); *C. remanei* females (upper right); *C. elegans* males (lower left); *C. remanei* males (lower right).

## **Acknowledgements**

We thank the *Caenorhabditis* Genetics Center (CGC) for strains, Z. Gitai and N. Wingreen for valuable discussions, and members of the Murphy laboratory for critically reading the manuscript. CS is supported by March of Dimes, and AMR by NIH 5T32GM007388-39. CTM is the Director of the Glenn Center for Aging Research at Princeton.

## **Author Contributions**

C.S., A.M.R., and C.T.M. designed experiments. C.S. and A.M.R. performed experiments. C.S. and C.T.M. wrote the paper.

## **References**

1. Fowler, K. & Partridge, L. A cost of mating in female fruitflies. *Nature* **338**, 760-761 (1989).
2. Partridge, L. & Farquhar, M. Sexual activity reduces lifespan of male fruitflies. *Nature* **294**, 580-582 (1981).
3. Gems, D. & Riddle, D.L. Longevity in *Caenorhabditis elegans* reduced by mating but not gamete production. *Nature* **379**, 723-725 (1996).
4. Shi, C. & Murphy, C.T. Mating induces shrinking and death in *Caenorhabditis* mothers. *Science* **343**, 536-540 (2014).
5. Maures, T.J. *et al.* Males shorten the life span of *C. elegans* hermaphrodites via secreted compounds. *Science* **343**, 541-544 (2014).
6. Van Voorhies W.A. Production of sperm reduces nematode lifespan. *Nature* **360**, 456-458 (1992).
7. Hodgkin, J. Male phenotypes and mating efficiency in *Caenorhabditis elegans*. *Genetics* **103**, 43-64 (1983).
8. Chasnov, J.R. & Chow, K.L. Why are there males in the hermaphrodites species *Caenorhabditis elegans*? *Genetics* **160**, 983-994 (2002).
9. Anderson, J.L., Morran, L.T. & Phillips, P.C. Outcrossing and the maintenance of males within *C. elegans* populations. *J. Hered.* **101**, S62-74 (2010).
10. Chasnov, J.R., So, W.K., Chan, C.M. & Chow, K.L. The species, sex, and stage specificity of a *Caenorhabditis* sex pheromone. *Proc. Natl. Acad. Sci. U.S.A.* **104**, 6730-6735 (2007).
11. Garcia, L.R., LeBoeuf, B. & Koo P. Diversity in mating behavior of hermaphroditic and male-female *Caenorhabditis* nematodes. *Genetics* **175**, 1761-1771 (2007).
12. Kleemann, G.A. & Basolo, A.L. Facultative decrease in mating resistance in hermaphroditic *Caenorhabditis elegans* with self-sperm depletion. *Anim. Behav.* **74**, 1339-1347 (2007).
13. Gems, D. & Riddle, D.L. Genetic, behavioral and environmental determinants of male longevity in *Caenorhabditis elegans*. *Genetics* **154**, 1597-2610 (2000).
14. Schedl, T. & Kimble, J. *fog-2*, a Germ-Line-Specific Sex Determination Gene Required for Hermaphrodite Spermatogenesis in *Caenorhabditis elegans*. *Genetics* **119**, 43-61 (1988).
15. Golden, J.W. & Riddle, D.L. A gene affecting production of the *Caenorhabditis elegans* dauer-inducing pheromone. *Mol. Gen. Genet.* **198**, 534-536 (1985).
16. Luo, S., Shaw, W., Ashraf, J. & Murphy, C.T. TGF- $\beta$  Sma/Mab signaling mutations uncouple reproductive aging from somatic aging. *PLoS Genetics* **5**, e1000789 (2009).
17. Frazier, H.N. & Roth, M.B. Adaptive sugar provisioning controls survival of *C. elegans* embryos in adverse environments. *Curr. Biol.* **19**, 859-863 (2009).
18. Tusher, V.G., Tibshirani, R. & Chu, G. Significance analysis of microarrays applied to the ionizing radiation response. *Proc Natl Acad Sci U S A* **98**, 5116-5121 (2001).
19. Kimble, J. & Sharrock, W.J. Tissue-specific synthesis of yolk proteins in *Caenorhabditis elegans*. *Developmental Biology* **96**, 189-196 (1983).
20. Garigan, D. *et al.* Genetic analysis of tissue aging in *Caenorhabditis elegans*: a role for heat-shock factor and bacterial proliferation. *Genetics* **161**, 1101-1112 (2002).
21. Murphy, C.T. *et al.* Genes that act downstream of DAF-16 to influence the lifespan of *Caenorhabditis elegans*. *Nature* **424**, 277-283 (2003).
22. Tepper, R.G. *et al.* PQM-1 complements DAF-16 as a key transcriptional regulator of DAF-2-mediated development and longevity. *Cell* **154**, 676-690 (2013).
23. Van Nostrand, E.L., Sanchez-Blanco, A., Wu, B., Nguyen, A. & Kim, S.K. Roles of the developmental regulator *unc-62/homothorax* in limiting longevity in *Caenorhabditis elegans*. *PLoS Genetics* **9**, e1003325 (2013).
24. DePina, A.S. *et al.* Regulation of *Caenorhabditis elegans* vitellogenesis by DAF-2/IIS through separable transcriptional and posttranscriptional mechanisms. *BMC Physiology* **11**: 11 (2011).
25. Min, K., Lee, C. & Park, H. The lifespan of Korean eunuchs. *Curr. Biol.* **22**, R792-793 (2012).
26. Morsci, N.S., Hass, L.A. & Barr, M.M. Sperm status regulates sexual attraction in *Caenorhabditis elegans*. *Genetics* **189**, 1341-1346 (2011).
27. Leighton, D.H.W., Choe, A., Wu, S.Y. & Sternberg, P.W. Communication between oocytes and somatic cells regulates volatile pheromone production in

- Caenorhabditis elegans*. *Proc Natl Acad Sci U S A* **111**, 17905-17910 (2014).
28. Wegewitz, V., Schulenburg, H. & Streit, A. Experimental insight into the proximate causes of male persistence variation among two strains of the androdioecious *Caenorhabditis elegans* (Nematoda). *BMC Ecology* **8**: 12 (2008).
  29. Stevens, L., Giordano, R. & Fialho, R. Male-killing, nematode infections, bacteriophage infection, and virulence of cytoplasmic bacteria in the genus *Wolbachia*. *Annual Review of Ecology and Systematics* **32**, 519-545 (2001).
  30. Stewart, A.D. & Phillips, P.C. Selection and maintenance of androdioecy in *Caenorhabditis elegans*. *Genetics* **160**, 975-982 (2002).
  31. Luo, S., Kleemann, G.A., Ashraf, J.M., Shaw, W.M. & Murphy, C.T. TGF- $\beta$  and insulin signaling regulate reproductive aging via oocyte and germline quality maintenance. *Cell* **143**, 299-312 (2010).

## Materials and Methods

### Strains:

CB4108: *fog-2(q71) V*

CB4037: *glp-1(e2141) III*

DR476: *daf-22(m130) II*

RT130: pwIs23 [vit-2::GFP] (translational fusion)

PB4641: *Caenorhabditis remanei*

### Individual male mating lifespan assays:

All the lifespan assays were performed at room temperature (about 20-21°C); except for *glp-1* males' lifespan assays (performed at 25-26°C). 35mm NGM plates were used for all the experiments in this study. 20  $\mu$ l of OP50 was dropped onto each plate to make a bacterial lawn of ~10 mm diameter. The next day, one synchronized late L4 male and one late L4 hermaphrodite/female were transferred onto each 35 mm NGM plate. For experiments in Fig. 1E, 1F, S1A-B,D, 2C, multiple L4 hermaphrodites were transferred together with one male. One late L4 male of the same age and genotype was transferred onto the control plates. Except for Fig. 2A, *fog-2(q71)* hermaphrodites were used as the hermaphrodites in the mating assay, because *fog-2* hermaphrodites do not have self sperm, thus allowing us to easily detect successful mating (i.e. eggs and progeny on the plates). We only included males that were able to produce progeny in our analysis. However, for the experiments regarding *glp-1* males, mating on FUDR, and inter-species cross between *C. elegans* males and *C. remanei* females, we included all the males in the analysis. Worms were transferred onto new plates every other day. If the hermaphrodites were lost or bagged, new unmated Day 1 *fog-2* hermaphrodites were added as replacement. Males and hermaphrodites/females were kept together for 6 days (unless

noted otherwise in the text); afterwards only males were transferred on to newly seeded plates every 2-3 days. For RNAi experiments in Fig. 3F, synchronized eggs were transferred onto NGM plates with RNAi bacteria, late L4 males were transferred and paired with *fog-2* L4 hermaphrodites onto NGM plates seeded with OP50 (to eliminate the possible effect on mating efficiency for different RNAi treatments). Two days later, males and hermaphrodites were transferred onto fresh plates seeded with corresponding RNAi bacteria and males were maintained on RNAi bacteria thereafter. When lifespan assays were completed, Kaplan-Meier analysis with log-rank (Mantel-Cox) method was performed to compare the lifespans of different groups.

### Grouped males:

35mm NGM plates were used for all the experiments in this study. 20  $\mu$ l of OP50 was dropped onto each plate to make a bacterial lawn of ~10 mm diameter. The next day, eight synchronized late L4 males were transferred onto each plate. (Two or four males per plate for experiment in Fig. 5A.) One late L4 male of the same age and genotype was transferred onto the control plates. Males were transferred onto fresh plates every two days, when the males were lost or dead, males from other plates were transferred together to make the size of the group stable.

### Male-conditioned plates (MCP) setup:

Male-conditioned plates for lifespan assays were prepared as previously described<sup>5</sup>. Briefly, 60  $\mu$ l of OP50 was dropped onto each 35mm NGM plate to make a bacterial lawn of ~25 mm diameter. Young Day 1 wild-type males (*fog-2* males) were transferred onto each plate. Two days later, they were removed and worms for lifespan assays were immediately transferred onto these male-conditioned plates. These male-conditioned plates were being prepared throughout the course of the lifespan assays (Fig. S4B). For the experiments in Fig. 6A,B, 30 males were used for each conditioning plate. For experiments in Fig. 6C,D, 8 males were used for conditioning and for the experiment in Fig. 5G, only 1 male was used for conditioning for each plate.

### Body size measurement:

Images of live males on 35mm plates were taken daily for the first week of adulthood with a Nikon SMZ1500 microscope. Image J was used to analyze the body size of the worms. The middle line of each worm was delineated using the segmented line tool and the total length was documented as the body length of the worm. T-test was performed to compare the body size differences between groups of males in the same day.

### **FUDR experiment:**

FUDR was added to the NGM media to the final concentration of 50  $\mu$ M. Late L4 males and hermaphrodites were transferred onto NGM+FUDR plates seeded with OP50. Worms were transferred every two days, and were kept on FUDR plates for different period of time (3 days, 6 days or lifetime as indicated by text).

### **Glycogen staining:**

Glycogen staining was performed according to a well-described protocol<sup>17</sup>. Mating of males was set up as previously described. Right before staining, live males of the same group were picked into a M9 droplet with 1M sodium azide on a 3% agarose pad. Immediately after the liquid was dry, the pad was inverted over the opening of a 50g bottle of iodine crystal chips (Sigma) for 1 minute. After the color stained by iodine vapor on the pad disappear (non-specific staining), the worms were immediately imaged by a Nikon microscope. Due to uncontrollable differences, it is hard to compare the staining performed at different times. Thus, worms from the groups of comparison were mounted onto the same pad (separate M9 droplet if there is no visible difference). Image J was used to compare the mean intensity of iodine staining after the background was subtracted. T-test was performed to compare the staining between different groups (on the same pad).

### **GFP intensity quantification:**

10-20 worms of each group were imaged by Nikon Ti. Image J was used to measure the mean and the maximum GFP intensity of the whole body area. T-test analysis was performed to compare the GFP intensity of different groups of worms.

### **Mated males microarrays:**

We paired a single male with a *fog-2* hermaphrodite for about 3.5 days of mating, then picked the males individually from the hermaphrodites on Day 4 for microarray analysis. As a control, solitary males were collected at the same time. About 150 males (on 150 individual 35mm plates) were collected for each condition and replicate. Three biological replicates were performed. RNA was extracted by heat-vortexing method. Two-color Agilent microarrays were used. The detailed steps and analysis were performed according to a previous report<sup>31</sup>.

### **Pheromone chemotaxis assay:**

This assay was modified from a previous assay<sup>10</sup>. 10 Day 1 virgin *C. remanei* or *C. elegans* hermaphrodites were put in 100  $\mu$ l of M9 buffer at room temperature overnight with

shaking. 100 males of either *C. elegans* or *C. remanei* were put in 100  $\mu$ l of M9. The supernatant solutions were then taken for pheromone chemotaxis assay. 60 mm NGM plates (no food) were used for the chemotaxis assay. Two destination spots (supernatant and M9 control) were separated by about 45 mm, the distance from the origin spot to either destination spot is 30mm. Two 1 $\mu$ l drops of 1M sodium azide were first applied to the destination spots. When dry, a drop of 1  $\mu$ l M9 or supernatant was separately added onto the destination spots. Then, over 10 young adult (Day 2) males were placed at the origin spot (try to transfer as little bacteria as possible). After 60 minutes, the paralyzed male worms were scored based on their location. The chemotaxis index was calculated as:  $(\#worms \text{ at supernatant destination} - \#worms \text{ at control destination}) / (\#total \text{ worms} - \#worms \text{ at origin})$ .

### **Analysis of Lifespans of Emperors in Imperial China:**

In ancient China, agriculture was the main source of the country's wealth. The development of agriculture began in the Neolithic Era (10,000 BC), followed by improvements in the Bronze Age (1000 BC). Late in the Warring states eras (771-221 BC), new iron tools were widely adopted, which revolutionized agriculture in China. Ancient China's economy depended heavily if not solely on agriculture.

Qin Shi Huang (#1 on the list below) was the first emperor to unify China. By that time, agriculture had already been well developed and the basic structure and the level of civilization did not change much until the late 1800s. Also, emperors had the best standard of living and medicine care at the time. Therefore, we think the living conditions of emperors in Imperial China (220 BC -1911) should be relatively similar (i.e., the best of agricultural civilization). Thus, although their living time spans over 2000 years, we grouped them together to perform lifespan analysis.

On our list (Table S4), we only included emperors who were over 18 years old when they died and those who reigned over 1 year, in order to exclude the cases of puppet emperors. Those rows marked by grey on the list indicate that the emperor's death is unnatural (killed in a war, rebellion, etc). We treated them in the same way as censored worms in the lifespan assays, by censoring at the time of death. Those highlighted in yellow are emperors with extreme promiscuous sexual behaviors, as documented by official historical records. Those labeled by shaded yellow means they were considered promiscuous and died unnaturally.

The average lifespan of promiscuous emperors was 34 years old, which is 35% shorter than the normal emperors' lifespan (52 years) (Fig. 7, Table S4). It should be noted that these promiscuous emperors were also noted to indulge themselves with alcohol. Thus, excessive alcohol intake could also be the

cause of their shorter lifespans. However, other emperors who were well-known for their lifelong alcohol indulgence were not short-lived (Examples are Yuan Tai Zong #216 on the list, died at 56; Yuan Shi Zu #219 died at 79). Another case worth noting is Song Gao Zong (#178), who was originally fertile but became infertile when he fled south after defeat by his enemies. By the time he re-established his dynasty in southern China, he was only 24, but was reportedly no longer capable of reproduction; he died at the age of 81. His case again suggests the link between germline signal and lifespan, perhaps in the same manner as the suggested lifespan extension of Korean eunuchs documented by Min, *et al.* (2012)<sup>25</sup>.

## Main Figure Legends

### Abbreviations and nomenclature in the paper:

*C. e.*: *C. elegans*

*C. r.*: *C. remanei*

**f1m\_6d**: “f” stands for hermaphrodite/female, “m” stands for male, the number before f/m suggests the amount of worms on the same 35mm plate. “6d” means mating for 6 days.

**AAA x BBB**: hermaphrodites/females of genotype AAA are mated with males of genotype BBB. (male is always listed after the “x”)

**MCP**: male-conditioned plates

### Figure 1. *C. elegans* males shrink and die early after mating.

- (A) Lifespans of unmated solitary and mated *fog-2(q71)* males. Solitary males:  $13.1 \pm 0.6$  days,  $n=50$ ; mated males:  $8.3 \pm 0.4$  days,  $n=34$ ,  $p<0.0001$ . Each male was paired with a *fog-2(q71)* hermaphrodite on a single 35mm plate during Day 1-6 of adulthood. Unless noted, all the hermaphrodites used are *fog-2(q71)*. For all the lifespan assays performed in this study, Kaplan-Meier analysis with log-rank (Mantel-Cox) test was used to determine statistical significance. All the lifespan results are included in Table S1.
- (B) Length of unmated and mated *fog-2* males: t-test,  $**p<0.01$ ,  $***p<0.001$ .
- (C) Representative pictures of the same unmated solitary male and male paired with one hermaphrodite from Day 1-Day 6 of adulthood.
- (D) Male post-mating lifespan decrease is mating duration-dependent: Unmated solitary males:  $10.9 \pm 0.6$  days,  $n=35$ ; one male and one hermaphrodite mating on Day 1 of adulthood:  $11.4 \pm 0.6$  days,  $n=31$ ,  $p=0.3697$ ; mating from Day 1-2:  $9.0 \pm 0.6$  days,  $n=30$ ,  $p=0.0325$ ; mating from Day 1-3:  $9.1 \pm 0.6$

days,  $n=34$ ,  $p=0.0452$ ; mating from Day 1-4:  $7.9 \pm 0.5$  days,  $n=32$ ,  $p=0.0002$ ; mating from Day 1-5:  $8.3 \pm 0.4$  days,  $n=34$ ,  $p=0.0006$ ; mating from Day 1-6:  $6.8 \pm 0.3$  days,  $n=33$ ,  $p<0.0001$ .

- (E) Lifespans of one male paired with different number of hermaphrodites during Day 1-3 of adulthood: solitary unmated males:  $13.8 \pm 0.7$  days,  $n=35$ ; one male with one hermaphrodite:  $10.8 \pm 0.6$  days,  $n=32$ ,  $p=0.0175$ ; one male with two hermaphrodites:  $11.6 \pm 0.9$  days,  $n=33$ ,  $p=0.1435$ ; one male with three hermaphrodites:  $10.6 \pm 0.8$  days,  $n=34$ ,  $p=0.0147$ .
- (F) Lifespans of one male paired with three hermaphrodites for 3 days but at different time of adulthood. Solitary unmated males:  $13.8 \pm 0.7$  days,  $n=35$ ; mating during Day 1-3 of adulthood:  $10.6 \pm 0.8$  days,  $n=34$ ,  $p=0.0147$ ; mating during Day 6-8 of adulthood:  $10.8 \pm 0.6$  days,  $n=37$ ,  $p=0.0022$ .

### Figure 2. Male post-mating shrinking death is germline-dependent.

- (A) Lifespans of *fog-2* males mated with *daf-22(m130)* hermaphrodites. Unmated solitary *fog-2* males:  $12.1 \pm 0.6$  days,  $n=32$ ; mated males:  $9.0 \pm 0.4$  days,  $n=29$ ,  $p=0.0001$ . In the mated group, one *fog-2(q71)* male was paired with one *daf-22(m130)* hermaphrodite from Day 1- Day 6 of adulthood.
- (B) Lifespans of unmated and mated *daf-22(m130)* males. Unmated solitary *daf-22(m130)* males:  $13.8 \pm 0.6$  days,  $n=40$ ; mated *daf-22(m130)* males:  $7.4 \pm 0.4$  days,  $n=34$ ,  $p<0.0001$ . In the mated group, one *daf-22(m130)* male was paired with one *fog-2(q71)* hermaphrodite from Day 1- Day 6 of adulthood.
- (C) FUDR can rescue male post-mating early death. Unmated solitary males:  $10.5 \pm 0.5$  days,  $n=35$ ; one male with three hermaphrodites for three days:  $6.4 \pm 0.3$  days,  $n=31$ ,  $p<0.0001$ ; one male with three hermaphrodites for three days but in the presence of  $50 \mu\text{M}$  FUDR during the three days' mating:  $10.2 \pm 0.4$  days,  $n=36$ ,  $p=0.7086$  (compared with unmated solitary group).
- (D) Lifespans of unmated and mated *glp-1(e2141)* males: unmated solitary *glp-1* males:  $8.0 \pm 0.4$  days,  $n=40$ ; mated *glp-1* males:  $7.2 \pm 0.4$  days,  $n=40$ ,  $p=0.3178$ . The assay was performed at  $26^\circ\text{C}$ , in mated group, one *glp-1* male was paired with one *fog-2* hermaphrodite from Day 1-6.
- (E) Length of mated and unmated *glp-1(e2141)* males. (The same population as in Fig. 2D)
- (F) Glycogen staining of mated and unmated males. Left: mated *fog-2* (wt) males lost over 30% glycogen after 5 days' mating.  $***p<0.001$ . Right: mated *glp-1* males had a similar amount of glycogen as the unmated *glp-1* males. The staining intensity was

normalized to unmated males of each genotype. Representative pictures are shown above the quantitation. Unmated males are framed by dashed lines, and mated males are framed by solid lines.

**Figure 3. Microarray analysis reveals vitellogenin's role in male post-mating death.**

- (A) Expression heatmap of genes whose expression is significantly changed in mated males based on SAM analysis.
- (B) Enriched GO terms for significantly up-regulated genes in mated males.
- (C) Enriched motif associated with significantly up-regulated genes predicted by RSAT (Regulatory Sequence Analysis Tools).
- (D) Ectopic expression of VIT-2::GFP in mated males is germline- dependent. 5 days' mating, pictures were taken on Day 6 of adulthood. Left: images; right: quantification of VIT-2::GFP expression [maximum  $\pm$  SE (error bars)], a.u., arbitrary units. \*\*\*,  $p < 0.001$ , t-test.
- (E) *pqm-1(ok485)* mated males have similar lifespans as unmated controls. Unmated solitary *pqm-1(ok485)* males:  $11.9 \pm 0.5$  days,  $n=25$ ; mated *pqm-1(ok485)* males:  $11.0 \pm 0.6$  days,  $n=29$ ,  $p=0.2782$ . In the mated group, one *pqm-1(ok485)* male was paired with one *fog-2(q71)* hermaphrodite from Day 1- Day 6 of adulthood.
- (F) *unc-62* RNAi suppresses male post-mating early death. Unmated solitary male on L4440:  $12.6 \pm 0.7$  days,  $n=25$ ; mated males on L4440:  $8.8 \pm 0.5$  days,  $n=33$ ,  $p=0.0001$ . Unmated males on *unc-62* RNAi:  $11.9 \pm 0.8$  days,  $n=25$ ; mated males on *unc-62* RNAi:  $10.6 \pm 0.5$  days,  $n=34$ ,  $p=0.1249$  (compared to unmated males on *unc-62* RNAi).

**Figure 4. Mating-induced early death in males is conserved.**

- (A) Mated *C. remanei* males also live shorter. Unmated solitary *C. remanei* males:  $31.4 \pm 1.7$  days,  $n=72$ ; mated *C. remanei* males:  $15.7 \pm 1.2$  days,  $n=28$ ,  $p < 0.0001$ . In mated group: one *C. remanei* male was paired with one *C. remanei* female from Day 1-Day 6 of adulthood.
- (B) Lifespans of *C. elegans* males mated with *C. elegans* hermaphrodites and *C. remanei* females. Unmated solitary *C. elegans* males:  $10.2 \pm 0.6$  days,  $n=35$ ; *C. elegans* males mated with *C. elegans* hermaphrodites:  $7.4 \pm 0.4$  days,  $n=35$ ,  $p=0.0001$ ; *C.*

*elegans* males mated with *C. remanei* females:  $7.4 \pm 0.4$  days,  $n=35$ ,  $p=0.0003$ . In mated groups, one *C. elegans* male was paired with either one *C. elegans* hermaphrodite or one *C. remanei* female from Day 1-6 of adulthood.

- (C) Average lifespan of promiscuous Chinese emperors ( $34 \pm 2$  yrs) is shorter than that of non-promiscuous emperors ( $52 \pm 1$  yr). See Methods and Table S4 for detailed rationale, description, and data.

**Figure 5. Grouped *C. elegans* males live shorter due to male pheromone.**

- (A) Lifespans of grouped *fog-2(q71)* males. Solitary males:  $12.0 \pm 0.4$  days,  $n=40$ ; two males:  $10.6 \pm 0.4$  days,  $n=40$ ,  $p=0.0397$ ; four males:  $9.9 \pm 0.4$  days,  $n=60$ ,  $p=0.0012$ ; eight males:  $7.7 \pm 0.2$  days,  $n=80$ ,  $p < 0.0001$ . Inset: clumping of *fog-2* males.
- (B) Lifespans of grouped *fog-2(q71)* males in the presence of  $50\mu\text{M}$  FUDR. Solitary males:  $13.9 \pm 0.4$  days,  $n=35$ ; eight males:  $12.4 \pm 0.3$  days,  $n=48$ ,  $p=0.0032$ .
- (C) Lifespans of grouped *C. remanei* males. Solitary males:  $37.9 \pm 1.1$  days,  $n=120$ ; eight males:  $31.0 \pm 0.9$  days,  $n=160$ ,  $p < 0.0001$ . Inset: *C. remanei* males rarely form clumps.
- (D) Lifespans of grouped *C. remanei* males in the presence of  $50\mu\text{M}$  FUDR. Solitary males:  $30.8 \pm 0.9$  days,  $n=45$ ; eight males:  $30.8 \pm 0.5$  days,  $n=112$ ,  $p=0.9217$ .
- (E) Grouped *daf-22(m130)* males have similar lifespan to solitary wild-type *fog-2* males. Solitary *fog-2* males:  $13.8 \pm 0.7$  days,  $n=35$ ; eight *fog-2* males:  $9.8 \pm 0.5$  days,  $n=48$ ,  $p < 0.0001$ ; eight *daf-22(m130)* males:  $14.7 \pm 0.7$  days,  $n=48$ ,  $p=0.4039$  (compared to solitary males).
- (F) Lifespans are not different between solitary and grouped *daf-22(m130)* in presence of FUDR. Solitary *daf-22(m130)*:  $15.3 \pm 0.3$  days,  $n=35$ ; eight *daf-22(m130)*:  $14.7 \pm 0.3$  days,  $n=48$ ,  $p=0.2117$ .
- (G) *daf-22(m130)* male lifespans on plates conditioned by wild-type *fog-2* males. MCP: male-conditioned plates. Solitary *daf-22(m130)*:  $23.0 \pm 0.9$  days,  $n=30$ ; *daf-22(m130)* on plates conditioned by one *fog-2* male:  $17.3 \pm 0.7$  days,  $n=29$ ,  $p < 0.0001$ ; *daf-22(m130)* on plates conditioned by eight *fog-2* male:  $16.1 \pm 0.6$  days,  $n=30$ ,  $p < 0.0001$ . Details about male-conditioned plates lifespan assays are included in Methods and Fig. S4B.

- fog-2* hermaphrodites control:  $14.4 \pm 0.8$  days,  $n=90$ .  
*fog-2* hermaphrodites on plates conditioned by *fog-2* males:  $10.9 \pm 0.6$  days,  $n=60$ ,  $p=0.0004$ ; *fog-2* hermaphrodites on plates conditioned by *C. remanei* males:  $11.9 \pm 0.5$  days,  $n=90$ ,  $p=0.0042$ .
- (B) Lifespans of grouped *C. remanei* females on plates conditioned by 30 males. *C. remanei* females on control plates:  $15.8 \pm 0.9$  days,  $n=60$ ; *C. remanei* females on plates conditioned by *C. remanei* males:  $19.5 \pm 1.3$  days,  $n=30$ ,  $p=0.0636$ ; *C. remanei* females on plates conditioned by *C. elegans fog-2* males:  $18.5 \pm 10.9$  days,  $n=60$ ,  $p=0.1770$ .
- (C) Lifespans of solitary *C. elegans fog-2* males and hermaphrodites on plates conditioned by eight *fog-2* males. Solitary *fog-2* males on control plates:  $12.1 \pm 0.6$  days,  $n=30$ ; solitary *fog-2* males on male-conditioned plates:  $9.8 \pm 0.4$  days,  $n=28$ ,  $p=0.0046$ . Solitary *fog-2* hermaphrodites on control plates:  $13.8 \pm 0.7$  days,  $n=30$ ; solitary *fog-2* hermaphrodites on male-conditioned plates:  $12.6 \pm 0.9$  days,  $n=29$ ,  $p=0.5965$ .
- (D) Lifespans of solitary *C. remanei* males and females on plates conditioned by eight *C. remanei* males. Solitary *C. remanei* males on control plates:  $35.8 \pm 2.0$  days,  $n=34$ ; solitary *C. remanei* males on male-conditioned plates:  $37.8 \pm 1.2$  days,  $n=34$ ,  $p=0.8501$ . Solitary *C. remanei* females on control plates:  $27.6 \pm 2.2$  days,  $n=24$ ; solitary *C. remanei* females on male-conditioned plates:  $27.0 \pm 2.5$  days,  $n=30$ ,  $p=0.8306$ .

### Figure 7. Average lifespan of Chinese emperors

Average lifespan of promiscuous Chinese emperors ( $34 \pm 2$  yrs) is shorter than that of non-promiscuous emperors ( $52 \pm 1$  yr). See Methods and Table S4 for detailed rationale, description, and data.

**Figure 8. Simplified model of how mating and male pheromone affect lifespan** in *C. elegans* hermaphrodites (upper left); *C. remanei* females (upper right); *C. elegans* males (lower left); *C. remanei* males (lower right).

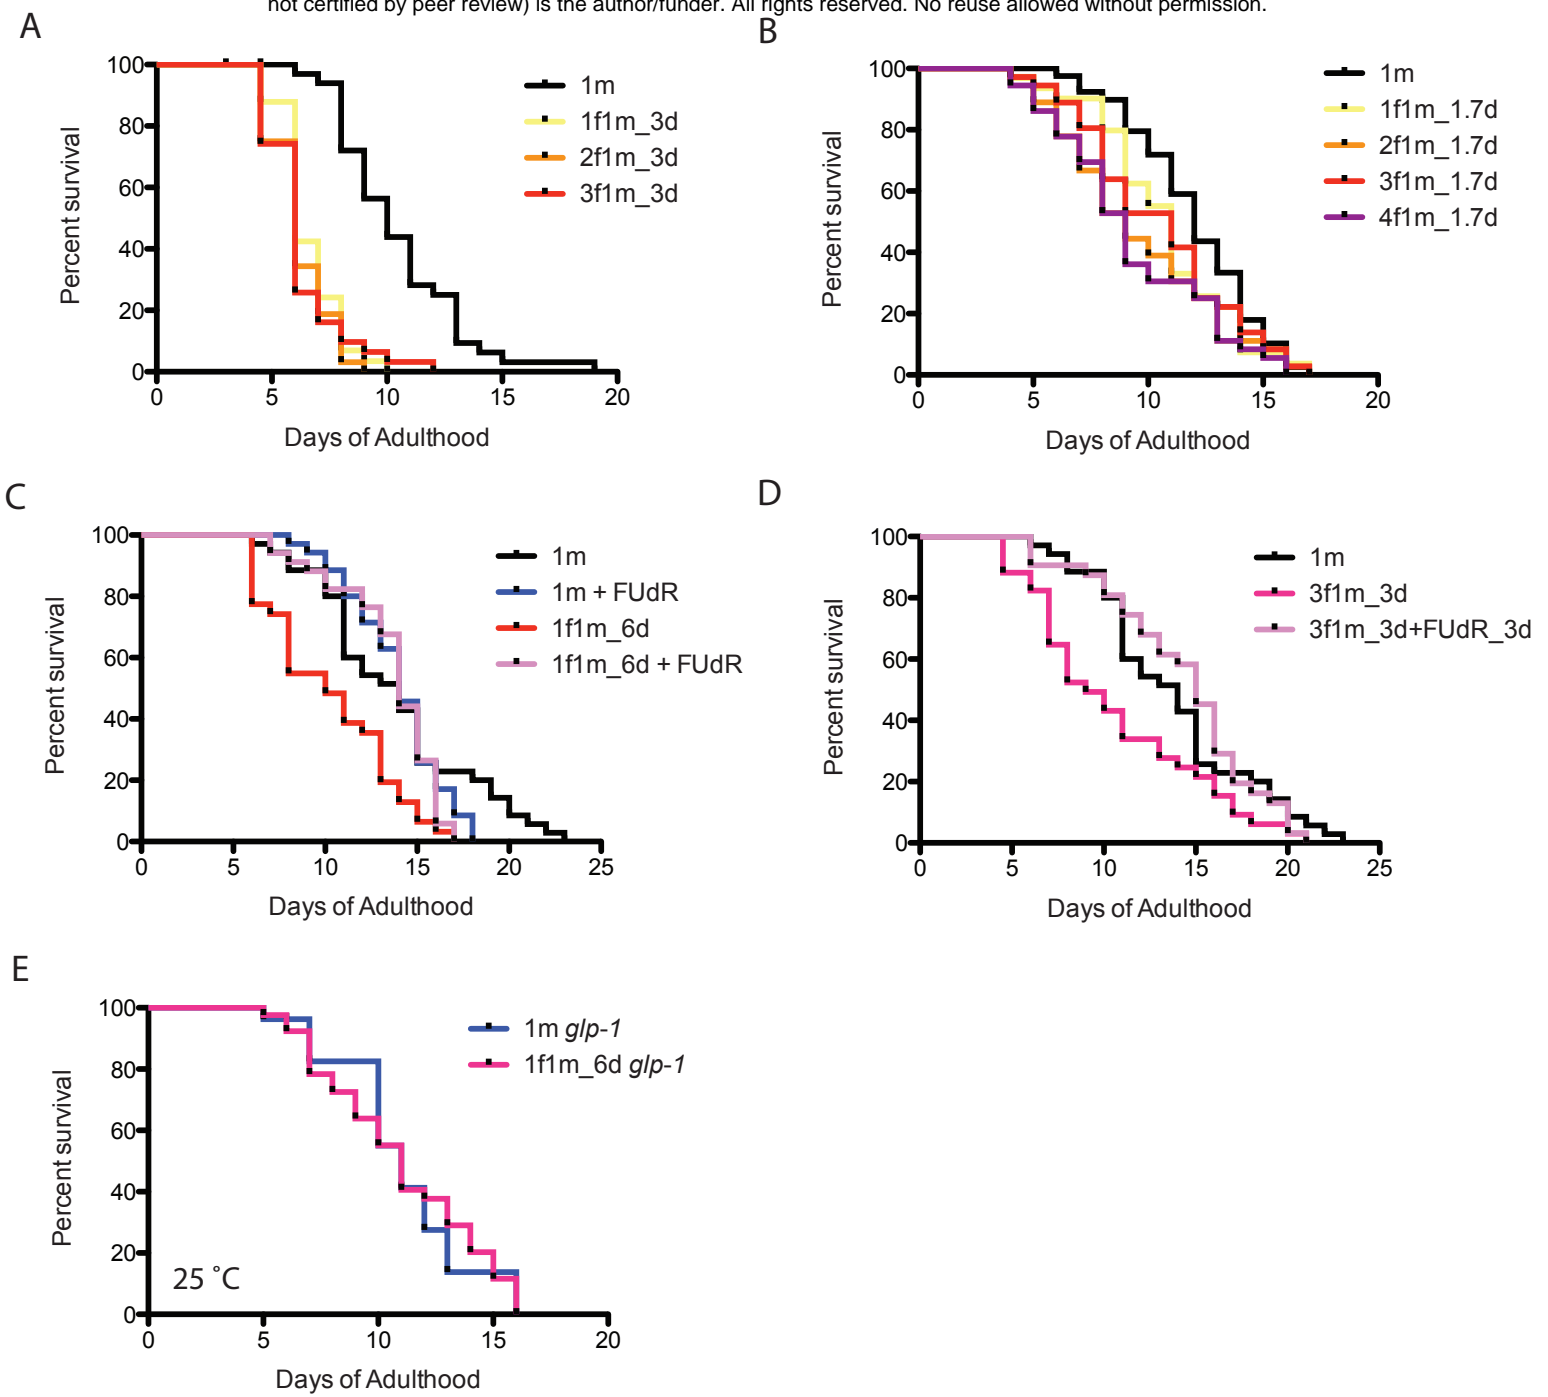



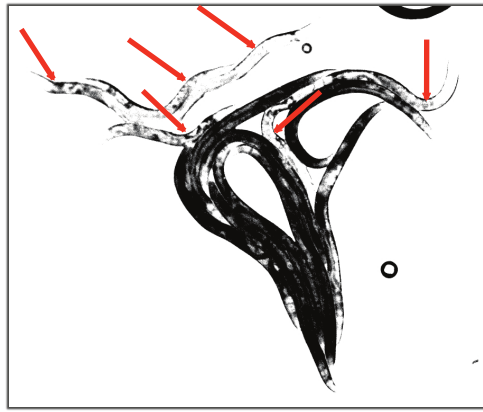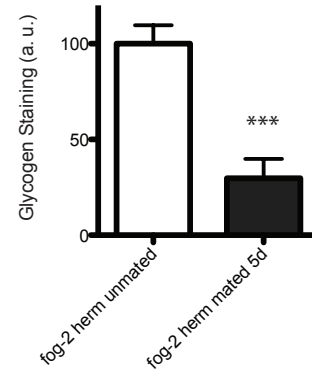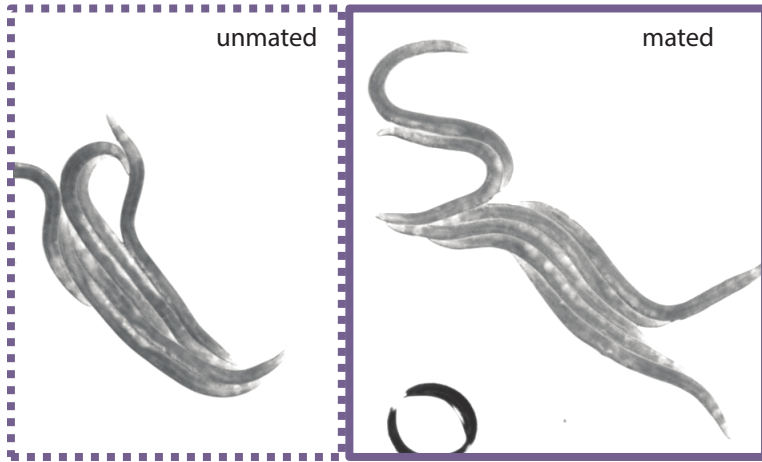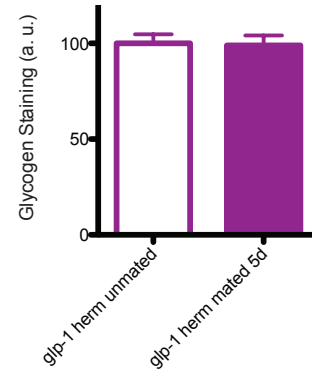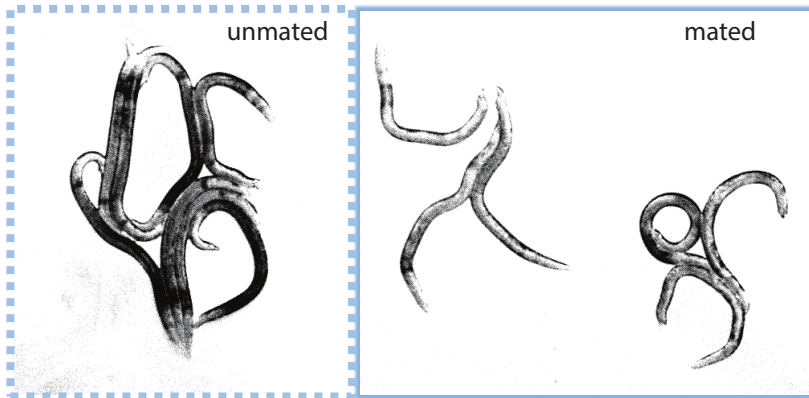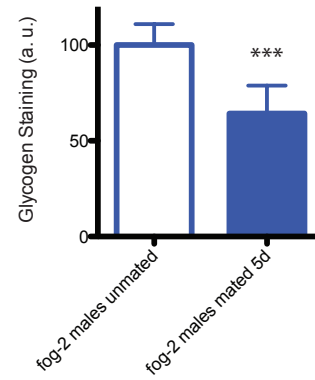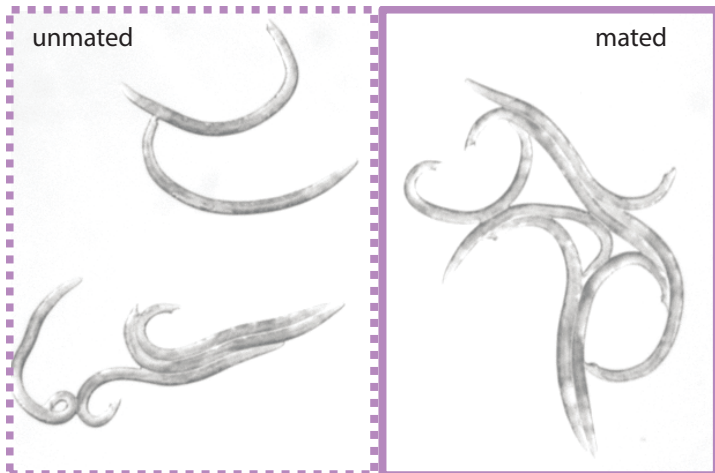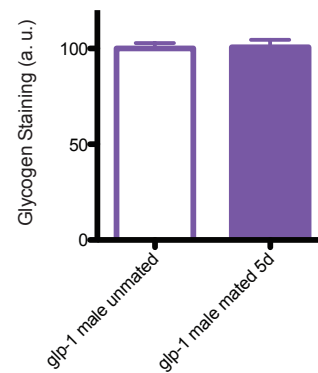

A

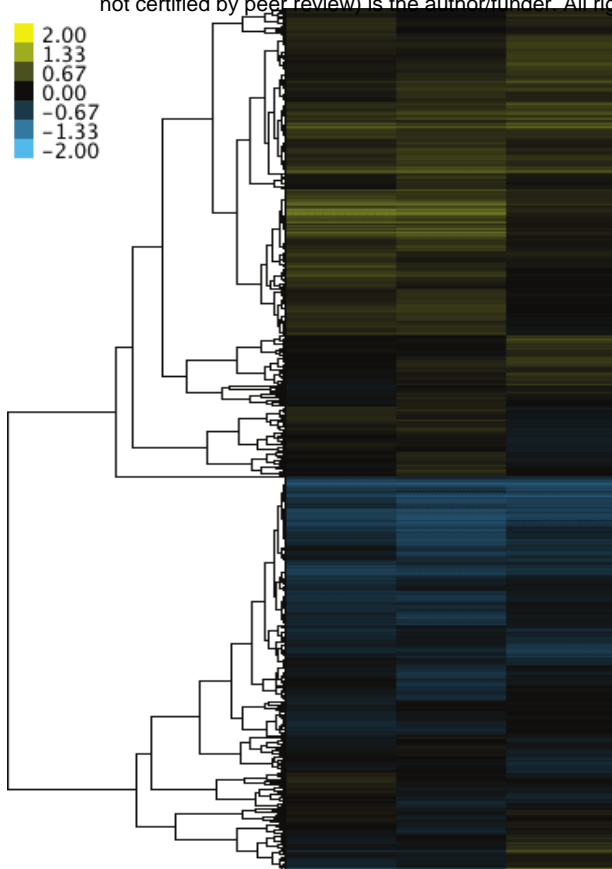

B

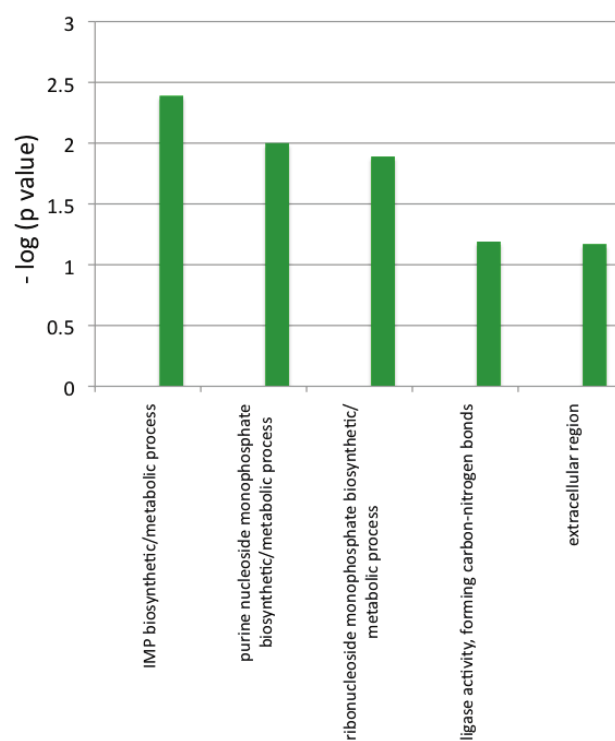

C

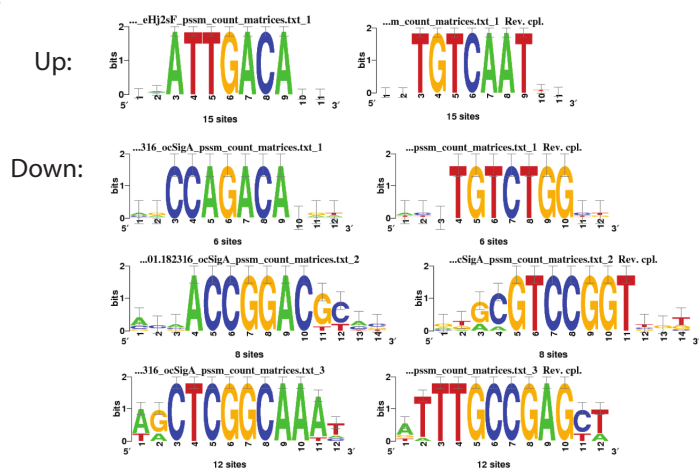

D

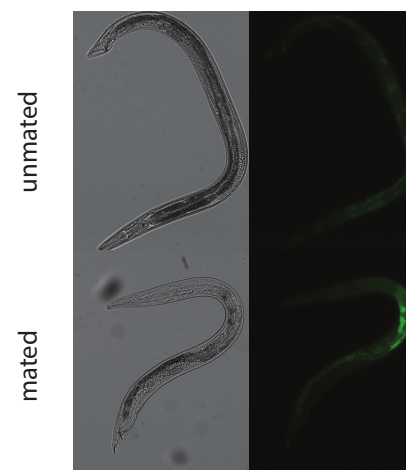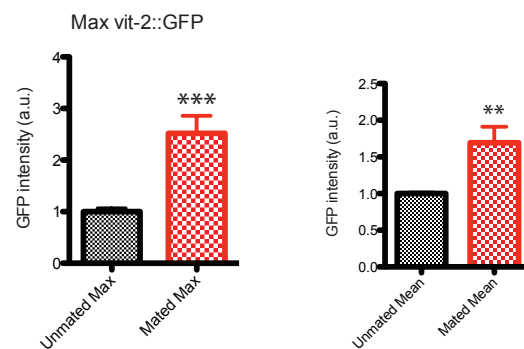

A

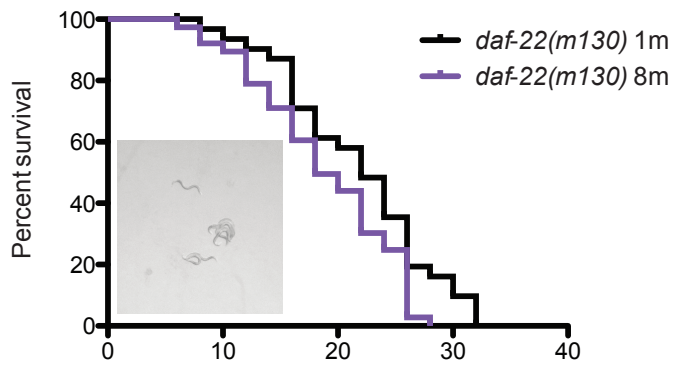

B

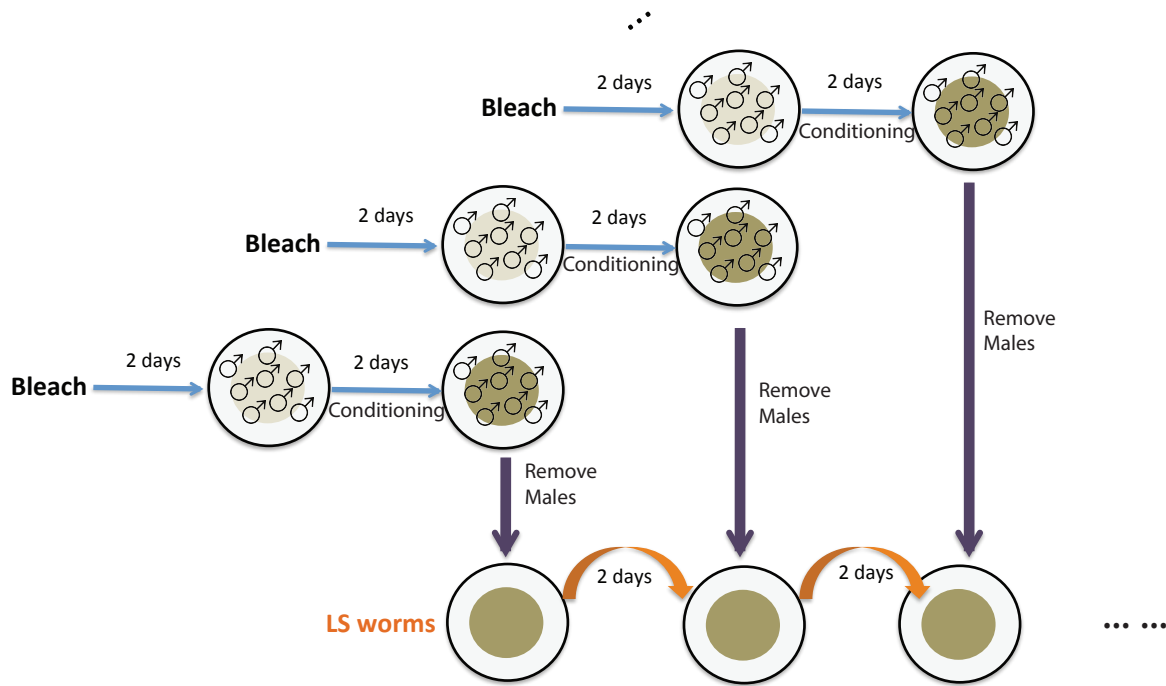

A

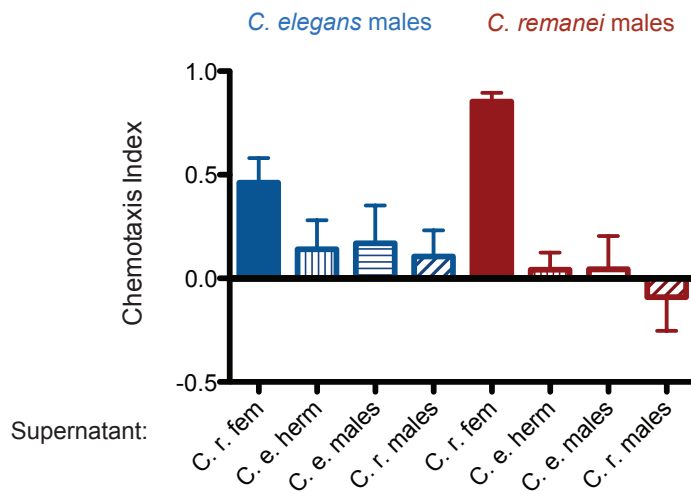

B

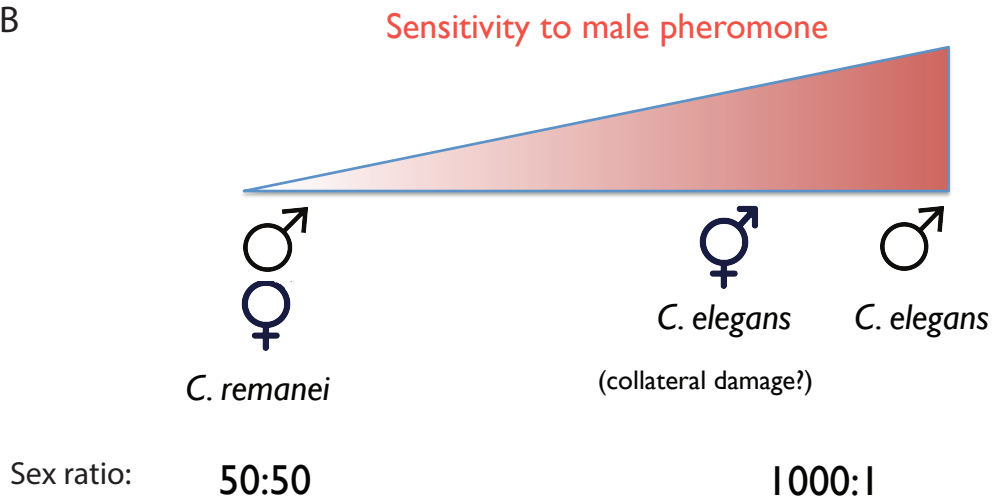

## Supplementary Figures:

### Fig. S1 How mating affects male lifespan.

- (A) Lifespans of one male paired with different number of hermaphrodites during Day 1-3 of adulthood: solitary unmated males:  $10.5 \pm 0.5$  days,  $n=35$ ; one male with one hermaphrodite:  $6.6 \pm 0.2$  days,  $n=33$ ,  $p<0.0001$ ; one male with two hermaphrodites:  $6.3 \pm 0.2$  days,  $n=32$ ,  $p<0.0001$ ; one male with three hermaphrodites:  $6.4 \pm 0.3$  days,  $n=31$ ,  $p<0.0001$ .
- (B) Lifespans of one male paired with different number of hermaphrodites for the first 1.7 days of adulthood: solitary unmated males:  $12.0 \pm 0.4$  days,  $n=40$ ; one male with one hermaphrodite:  $10.6 \pm 0.5$  days,  $n=32$ ,  $p=0.0824$ ; one male with two hermaphrodites:  $9.7 \pm 0.6$  days,  $n=37$ ,  $p=0.0435$ ; one male with three hermaphrodites:  $10.4 \pm 0.6$  days,  $n=36$ ,  $p=0.1575$ ; one male with four hermaphrodites:  $9.3 \pm 0.6$  days,  $n=36$ ,  $p=0.0041$ .
- (C) FUDR can rescue male post-mating early death. Unmated solitary males:  $13.8 \pm 0.7$  days,  $n=35$ ; one male with one hermaphrodite for six days:  $10.3 \pm 0.6$  days,  $n=31$ ,  $p=0.0006$ ; solitary male in the presence of  $50 \mu\text{M}$  FUDR:  $13.9 \pm 0.4$  days,  $n=35$ ,  $p=0.4079$  (compared to unmated solitary group). One male mating with one hermaphrodites for 6 days in the presence of FUDR:  $13.6 \pm 0.5$  days,  $n=34$ ,  $p=0.3992$  (compared to unmated solitary group).
- (D) Lifespans of males paired with three hermaphrodites for 3 days with FUDR: unmated solitary males:  $13.8 \pm 0.7$  days,  $n=35$ ; one male with three hermaphrodites for three days:  $10.6 \pm 0.8$  days,  $n=34$ ,  $p=0.0147$ ; one male with three hermaphrodites for three days but in the presence of  $50 \mu\text{M}$  FUDR during the three days' mating:  $14.3 \pm 0.7$  days,  $n=32$ ,  $p=0.8740$  compared with unmated solitary group.
- (E) Lifespans of unmated and mated *glp-1(e2141)* males: unmated solitary *glp-1* males:  $11.1 \pm 1.0$  days,  $n=27$ ; mated *glp-1* males:  $11.1 \pm 0.5$  days,  $n=43$ ,  $p=0.9149$ . The assay was performed at  $25^\circ\text{C}$ , in mated group, one *glp-1* male was paired with one *fog-2* hermaphrodite from Day 1-6.

### Fig. S2 Glycogen staining of mated vs unmated hermaphrodites and males.

Left: representative pictures of iodine staining of worms. Unmated worms are framed by dashed lines,

whereas mated worms are framed by solid lines. In the first picture, mated and unmated *fog-2* hermaphrodites were mixed together, with red arrows pointing to mated *fog-2* hermaphrodites. Worms were mated from Day 1 – Day 5 and were imaged on Day 5.

Right: quantitation of iodine staining. The intensity of mated worms was normalized to unmated control of the same genotype. Mated *fog-2* hermaphrodites have 30% glycogen compared to unmated *fog-2* hermaphrodites of the same age ( $p<0.0001$ ). Mated *glp-1* hermaphrodites have 99% glycogen compared to unmated *glp-1* hermaphrodites control ( $p=0.6070$ ). Mated *fog-2* males have 64% glycogen compared to unmated *fog-2* males of the same age ( $p<0.0001$ ). Mated *glp-1* males have 101% glycogen compared to unmated *glp-1* males control ( $p=0.7107$ ). Error bars represent SD. \*\*\*,  $p<0.0001$ , t-test.

### Fig. S3 Microarray analysis of mated males.

- (A) Expression heat map of clustered mated males vs unmated males. Individual males were paired with one hermaphrodite for 3.5 days and collected on Day 4 for microarrays.
- (B) Enriched GO terms for significantly down-regulated genes in mated males.
- (C) Enriched motifs in promoter region (1kb upstream of TSS) of significantly up- and down-regulated genes using (RSAT) Regulatory Sequence Analysis Tools ([www.rsat.eu](http://www.rsat.eu)).
- (D) VIT-2::GFP expression in males increases significantly after mating. Upper: DIC and GFP images; Lower: GFP intensity quantitation, left:  $\text{max} \pm \text{SE}$  (error bars); right:  $\text{mean} \pm \text{SE}$  (error bars), a.u., arbitrary units. \*\*,  $p<0.01$ , t-test.

### Fig. S4 Male pheromone and male-conditioned plates (MCP).

- (A) Lifespans of grouped *daf-22(m130)* males. Solitary males:  $21.7 \pm 1.2$  days,  $n=32$ ; eight males:  $18.8 \pm 1.0$

days, n=38, p=0.0394. Inset: *daf-22(m130)* males also form clumps.

- (B) Schematic illustration of how lifespan assays on male-conditioned plates were performed. Detailed description is included in Methods.

**Fig. S5. Male chemotaxis to different pheromones.**

- (A) Supernatant solutions from *C. elegans* males, *C. remanei* males, *C. elegans* N2 hermaphrodites, and *C. remanei* females are used to do the chemotaxis assay. See Methods for detailed description. *C. e.* males to supernatant of *C. r.* females: Chemotaxis Index (CI) is  $0.46 \pm 0.11$  ( mean  $\pm$  SEM, n=12 [plates]); *C. e.* males to supernatant of *C. e.* hermaphrodites: CI =  $0.14 \pm 0.13$  (n=10); *C. e.* males to supernatant of *C. e.* males: CI =  $0.17 \pm 0.17$  (n=12); *C. e.* males to supernatant of *C. r.* males: CI =  $0.11 \pm 0.12$  (n=11); *C. r.* males to supernatant of *C. r.* females: CI =  $0.85 \pm 0.04$  (n=12); *C. r.* males to supernatant of *C. e.* hermaphrodites: CI =  $0.04 \pm 0.08$  (n=12); *C. r.* males to supernatant of *C. e.* males: CI =  $0.04 \pm 0.15$  (n=12); *C. r.* males to supernatant of *C. r.* males: CI =  $-0.09 \pm 0.16$  (n=12).
- (B) Toxicity scale of sensitivity to male pheromone.

## Supplementary Tables:

### Table S1. Lifespan assays summary

| Genotype/condition                   | Mean LS $\pm$ std. error | % change | p value | N  | Related Figure |
|--------------------------------------|--------------------------|----------|---------|----|----------------|
| <b>Experiment 1</b>                  |                          |          |         |    |                |
| 1m <i>fog-2</i>                      | 13.1 $\pm$ 0.6           | --       | --      | 50 | Fig. 1A        |
| 1f1m_6d <i>fog-2</i>                 | 8.3 $\pm$ 0.4            | -37%     | <0.0001 | 34 | Fig. 1A        |
| 1f1m_1.5d <i>fog-2</i>               | 11.9 $\pm$ 0.6           | -9%      | 0.0988  | 38 |                |
| 2m <i>fog-2</i>                      | 11.4 $\pm$ 0.5           | -13%     | 0.0149  | 48 |                |
| 4m <i>fog-2</i>                      | 9.3 $\pm$ 0.6            | -29%     | <0.0001 | 48 |                |
| <b>Experiment 2</b>                  |                          |          |         |    |                |
| 1m <i>fog-2</i>                      | 10.9 $\pm$ 0.6           | --       | --      | 35 | Fig. 1D        |
| 1f1m_1d <i>fog-2</i>                 | 11.4 $\pm$ 0.6           | +5%      | 0.3697  | 31 | Fig. 1D        |
| 1f1m_2d <i>fog-2</i>                 | 9.0 $\pm$ 0.6            | -17%     | 0.0325  | 30 | Fig. 1D        |
| 1f1m_3d <i>fog-2</i>                 | 9.1 $\pm$ 0.6            | -17%     | 0.0452  | 34 | Fig. 1D        |
| 1f1m_4d <i>fog-2</i>                 | 7.9 $\pm$ 0.5            | -28%     | 0.0002  | 32 | Fig. 1D        |
| 1f1m_5d <i>fog-2</i>                 | 8.3 $\pm$ 0.4            | -24%     | 0.0006  | 34 | Fig. 1D        |
| 1f1m_6d <i>fog-2</i>                 | 6.8 $\pm$ 0.3            | -38%     | <0.0001 | 33 | Fig. 1D        |
| <b>Experiment 3</b>                  |                          |          |         |    |                |
| 1m <i>fog-2</i>                      | 13.8 $\pm$ 0.7           | --       | --      | 35 | Fig. 1E        |
| 1f1m_3d <i>fog-2</i>                 | 10.8 $\pm$ 0.6           | -22%     | 0.0175  | 32 | Fig. 1E        |
| 2f1m_3d <i>fog-2</i>                 | 11.6 $\pm$ 0.9           | -16%     | 0.1435  | 33 | Fig. 1E        |
| 3f1m_3d <i>fog-2</i>                 | 10.6 $\pm$ 0.8           | -23%     | 0.0147  | 34 | Fig. 1E        |
| <b>Experiment 4</b>                  |                          |          |         |    |                |
| 1m <i>fog-2</i>                      | 10.5 $\pm$ 0.5           | --       | --      | 35 | Fig. S1A       |
| 1f1m_3d <i>fog-2</i>                 | 6.6 $\pm$ 0.2            | -37%     | <0.0001 | 33 | Fig. S1A       |
| 2f1m_3d <i>fog-2</i>                 | 6.3 $\pm$ 0.2            | -40%     | <0.0001 | 32 | Fig. S1A       |
| 3f1m_3d <i>fog-2</i>                 | 6.4 $\pm$ 0.3            | -39%     | <0.0001 | 31 | Fig. S1A       |
| <b>Experiment 5</b>                  |                          |          |         |    |                |
| 1m <i>fog-2</i>                      | 12.0 $\pm$ 0.4           | --       | --      | 40 | Fig. S1B       |
| 1f1m_1.7d <i>fog-2</i>               | 10.6 $\pm$ 0.5           | -12%     | 0.0824  | 32 | Fig. S1B       |
| 2f1m_1.7d <i>fog-2</i>               | 9.7 $\pm$ 0.6            | -19%     | 0.0435  | 37 | Fig. S1B       |
| 3f1m_1.7d <i>fog-2</i>               | 10.4 $\pm$ 0.6           | -13%     | 0.1575  | 36 | Fig. S1B       |
| 4f1m_1.7d <i>fog-2</i>               | 9.3 $\pm$ 0.6            | -23%     | 0.0041  | 36 | Fig. S1B       |
| <b>Experiment 6</b>                  |                          |          |         |    |                |
| 1m <i>fog-2</i>                      | 13.8 $\pm$ 0.7           | --       | --      | 35 | Fig. 1F        |
| 3f1m_3d(D1-3) <i>fog-2</i>           | 10.6 $\pm$ 0.8           | -23%     | 0.0147  | 34 | Fig. 1F        |
| 3f1m_3d(D6-8) <i>fog-2</i>           | 10.8 $\pm$ 0.6           | -22%     | 0.0022  | 37 | Fig. 1F        |
| <b>Experiment 7</b>                  |                          |          |         |    |                |
| 1m <i>fog-2</i>                      | 12.1 $\pm$ 0.6           | --       | --      | 32 | Fig. 2A        |
| 1f1m_6d <i>daf-22</i> x <i>fog-2</i> | 9.0 $\pm$ 0.4            | -26%     | 0.0001  | 29 | Fig. 2A        |
| <b>Experiment 8</b>                  |                          |          |         |    |                |
| 1m <i>daf-22</i>                     | 13.8 $\pm$ 0.6           | --       | --      | 40 | Fig. 2B        |
| 1f1m_6d <i>fog-2</i> x <i>daf-22</i> | 7.4 $\pm$ 0.4            | -46%     | <0.0001 | 34 | Fig. 2B        |
| <b>Experiment 9</b>                  |                          |          |         |    |                |
| 1m <i>fog-2</i>                      | 10.5 $\pm$ 0.5           | --       | --      | 35 | Fig. 2C        |
| 3f1m_3d <i>fog-2</i>                 | 6.4 $\pm$ 0.3            | -39%     | <0.0001 | 31 | Fig. 2C        |

|                                         |            |      |         |     |          |
|-----------------------------------------|------------|------|---------|-----|----------|
| 3f1m_3d+FUdR <i>fog-2</i>               | 10.2 ± 0.4 | -3%  | 0.7086  | 36  | Fig. 2C  |
| <b>Experiment 10</b>                    |            |      |         |     |          |
| 1m <i>fog-2</i>                         | 13.8 ± 0.7 | --   | --      | 35  | Fig. S1C |
| 1f1m_6d <i>fog-2</i>                    | 10.3 ± 0.6 | -25% | 0.0006  | 31  | Fig. S1C |
| 1m+FUdR <i>fog-2</i>                    | 13.9 ± 0.4 | +1%  | 0.4079  | 35  | Fig. S1C |
| 1f1m_6d+FUdR <i>fog-2</i>               | 13.6 ± 0.5 | -1%  | 0.3992  | 34  | Fig. S1C |
| 3f1m_3d <i>fog-2</i>                    | 10.6 ± 0.8 | -23% | 0.0147  | 34  | Fig. S1D |
| 3f1m_3d+FUdR <i>fog-2</i>               | 14.3 ± 0.7 | +4%  | 0.8740  | 32  | Fig. S1D |
| <b>Experiment 11 @26°C</b>              |            |      |         |     |          |
| 1m <i>glp-1</i>                         | 8.0 ± 0.4  | --   | --      | 40  | Fig. 2D  |
| 1f1m_6d <i>fog-2</i> x <i>glp-1</i>     | 7.2 ± 0.4  | -10% | 0.3178  | 40  | Fig. 2D  |
| <b>Experiment 12 @25°C</b>              |            |      |         |     |          |
| 1m <i>glp-1</i>                         | 11.1 ± 1.0 | --   | --      | 27  | Fig. S1E |
| 1f1m_6d <i>fog-2</i> x <i>glp-1</i>     | 11.1 ± 0.5 | 0%   | 0.9149  | 43  | Fig. S1E |
| <b>Experiment 13 @26°C</b>              |            |      |         |     |          |
| 1m <i>glp-1</i>                         | 9.6 ± 0.4  | --   | --      | 40  |          |
| 1f1m_6d <i>fog-2</i> x <i>glp-1</i>     | 8.8 ± 0.5  | -8%  | 0.238   | 40  |          |
| <b>Experiment 14</b>                    |            |      |         |     |          |
| 1m <i>pqm-1</i>                         | 11.9 ± 0.5 | --   | --      | 25  | Fig. 3E  |
| 1f1m_6d <i>fog-2</i> x <i>pqm-1</i>     | 11.0 ± 0.6 | -8%  | 0.2782  | 29  | Fig. 3E  |
| <b>Experiment 15</b>                    |            |      |         |     |          |
| 1m <i>fog-2</i> (L4440)                 | 12.6 ± 0.7 | --   | --      | 25  | Fig. 3F  |
| 1f1m_4d <i>fog-2</i> (L4440)            | 8.8 ± 0.5  | -30% | 0.0001  | 33  | Fig. 3F  |
| 1m <i>fog-2</i> ( <i>unc-62i</i> )      | 11.9 ± 0.8 | --   | --      | 25  | Fig. 3F  |
| 1f1m_4d <i>fog-2</i> ( <i>unc-62i</i> ) | 10.6 ± 0.5 | -11% | 0.1249  | 34  | Fig. 3F  |
| <b>Experiment 16</b>                    |            |      |         |     |          |
| 1m <i>C. r.</i>                         | 31.4 ± 1.7 | --   | --      | 72  | Fig. 4A  |
| 1f1m_6d <i>C. r.</i>                    | 15.7 ± 1.2 | -50% | <0.0001 | 28  | Fig. 4A  |
| <b>Experiment 17</b>                    |            |      |         |     |          |
| 1m <i>C. e.</i>                         | 10.2 ± 0.6 | --   | --      | 35  | Fig. 4B  |
| 1m1f_6d <i>C. e.</i> x <i>C. e.</i>     | 7.4 ± 0.4  | -27% | 0.0001  | 35  | Fig. 4B  |
| 1m1f_6d <i>C. r.</i> x <i>C. e.</i>     | 7.4 ± 0.4  | -27% | 0.0003  | 35  | Fig. 4B  |
| <b>Chinese Emperors LS</b>              |            |      |         |     |          |
| Normal                                  | 52.3 ± 1.0 | --   | --      | 234 | Fig. 7   |
| Promiscuous                             | 34.0 ± 1.9 | -35% | <0.0001 | 21  | Fig. 7   |
| <b>Experiment 18</b>                    |            |      |         |     |          |
| 1m <i>fog-2</i>                         | 12.0 ± 0.4 | --   | --      | 40  | Fig. 5A  |
| 2m <i>fog-2</i>                         | 10.6 ± 0.4 | -12% | 0.0397  | 40  | Fig. 5A  |
| 4m <i>fog-2</i>                         | 9.9 ± 0.4  | -18% | 0.0012  | 60  | Fig. 5A  |
| 8m <i>fog-2</i>                         | 7.7 ± 0.2  | -36% | <0.0001 | 80  | Fig. 5A  |
| <b>Experiment 19</b>                    |            |      |         |     |          |
| 1m+FUdR <i>fog-2</i>                    | 13.9 ± 0.4 | --   | --      | 35  | Fig. 5B  |
| 8m+FUdR <i>fog-2</i>                    | 12.4 ± 0.3 | -11% | 0.0032  | 48  | Fig. 5B  |
| 1m <i>fog-2</i>                         | 13.8 ± 0.7 | --   | --      | 35  | Fig. 5E  |
| 8m <i>fog-2</i>                         | 9.8 ± 0.5  | -29% | <0.0001 | 48  | Fig. 5E  |
| 8m <i>daf-22</i>                        | 14.7 ± 0.7 | +7%  | 0.4039  | 48  | Fig. 5E  |



|                                    |            |      |         |     |          |
|------------------------------------|------------|------|---------|-----|----------|
| 1m+FUdR <i>daf-22</i>              | 15.3 ± 0.3 | --   | --      | 35  | Fig. 5F  |
| 8m+FUdR <i>daf-22</i>              | 14.7 ± 0.3 | -4%  | 0.2117  | 48  | Fig. 5F  |
| 1m <i>daf-22</i>                   | 17.2 ± 0.6 | --   | --      | 35  |          |
| 8m <i>daf-22</i>                   | 14.7 ± 0.7 | -15% | 0.0660  | 48  |          |
| <b>Experiment 20</b>               |            |      |         |     |          |
| 1m <i>daf-22</i>                   | 21.7 ± 1.2 | --   | --      | 32  | Fig. S4A |
| 8m <i>daf-22</i>                   | 18.8 ± 1.0 | -13% | 0.0394  | 38  | Fig. S4A |
| <b>Experiment 21</b>               |            |      |         |     |          |
| 1m <i>C.r.</i>                     | 37.9 ± 1.1 | --   | --      | 120 | Fig. 5C  |
| 8m <i>C.r.</i>                     | 31.0 ± 0.9 | -18% | <0.0001 | 160 | Fig. 5C  |
| <b>Experiment 22</b>               |            |      |         |     |          |
| 1m <i>C.r.</i> + FUdR              | 30.8 ± 0.9 | --   | --      | 45  | Fig. 5D  |
| 8m <i>C.r.</i> + FUdR              | 30.8 ± 0.5 | 0%   | 0.9217  | 112 | Fig. 5D  |
| <b>Experiment 23</b>               |            |      |         |     |          |
| 1m <i>daf-22</i> ctrl              | 23.0 ± 0.9 | --   | --      | 30  | Fig. 5G  |
| 1m <i>daf-22</i> ≤1mMCP            | 17.3 ± 0.7 | -25% | <0.0001 | 29  | Fig. 5G  |
| 1m <i>daf-22</i> ≤8mMCP            | 16.1 ± 0.6 | -30% | <0.0001 | 30  | Fig. 5G  |
| <b>Experiment 24</b>               |            |      |         |     |          |
| <i>C.e. herm</i> ctrl              | 14.4 ± 0.8 | --   | --      | 90  | Fig. 6A  |
| <i>C.e. herm</i> ≤ <i>C.e.</i> MCP | 10.9 ± 0.6 | -24% | 0.0004  | 60  | Fig. 6A  |
| <i>C.e. herm</i> ≤ <i>C.r.</i> MCP | 11.9 ± 0.5 | -17% | 0.0042  | 90  | Fig. 6A  |
| <i>C.r. fem</i> ctrl               | 15.8 ± 0.9 | --   | --      | 60  | Fig. 6B  |
| <i>C.r. fem</i> ≤ <i>C.r.</i> MCP  | 19.5 ± 1.3 | +23% | 0.0636  | 30  | Fig. 6B  |
| <i>C.r. fem</i> ≤ <i>C.e.</i> MCP  | 18.5 ± 0.9 | +17% | 0.1770  | 60  | Fig. 6B  |
| <b>Experiment 25</b>               |            |      |         |     |          |
| 1m <i>C. e.</i>                    | 12.1 ± 0.6 | --   | --      | 30  | Fig. 6C  |
| 1m ≤8mMCP <i>C. e.</i>             | 9.8 ± 0.4  | -19% | 0.0046  | 28  | Fig. 6C  |
| 1f <i>C. e.</i>                    | 13.8 ± 0.7 | --   | --      | 30  | Fig. 6C  |
| 1f ≤8mMCP <i>C. e.</i>             | 12.6 ± 0.9 | -9%  | 0.5965  | 29  | Fig. 6C  |
| <b>Experiment 26</b>               |            |      |         |     |          |
| 1m <i>C. r.</i>                    | 35.8 ± 2.0 | --   | --      | 34  | Fig. 6D  |
| 1m ≤8mMCP <i>C. r.</i>             | 37.8 ± 1.2 | +6%  | 0.8501  | 34  | Fig. 6D  |
| 1f <i>C. r.</i>                    | 27.6 ± 2.2 | --   | --      | 24  | Fig. 6D  |
| 1f ≤8mMCP <i>C. r.</i>             | 27.0 ± 2.5 | -2%  | 0.8306  | 30  | Fig. 6D  |

**Table S2. Body size measurements**

| <b>Genotype/<br/>condition</b> | <b>N</b> |                              | <b>Day 1</b> | <b>Day 2</b> | <b>Day 3</b> | <b>Day 4</b> | <b>Day 5</b> | <b>Day 6</b> | <b>Day 7</b> |
|--------------------------------|----------|------------------------------|--------------|--------------|--------------|--------------|--------------|--------------|--------------|
| <i>fog-2(q71)</i><br>unmated   | 31       | <b>Body length ± SE (µm)</b> | 903.6 ± 5.0  | 961.9 ± 5.6  | 982.8 ± 7.2  | 976.2 ± 7.2  | 959.0 ± 7.4  | 935.9 ± 8.1  | 931.5 ± 10.3 |
| <i>fog-2(q71)</i><br>mated     | 30       |                              | 893.8 ± 5.1  | 938.2 ± 5.6  | 955.4 ± 7.1  | 941.0 ± 9.5  | 913.7 ± 14.0 | 855.9 ± 19.4 | 851.4 ± 24.5 |
| @20°C                          |          | <b>p value</b>               | 0.1813       | 0.004        | 0.0088       | 0.0044       | 0.0055       | 0.0004       | 0.0015       |
|                                |          | <b>% change</b>              | -1.1%        | -2.5%        | -2.8%        | -3.6%        | -4.7%        | -8.6%        | -8.6%        |
|                                |          |                              |              |              |              |              |              |              |              |
| <i>glp-1(e2141)</i><br>unmated | 40       | <b>Body length ± SE (µm)</b> | 789.6 ± 11.3 | 880.1 ± 6.4  | 894.0 ± 7.1  | 895.1 ± 7.3  | 888.8 ± 7.9  | 872.0 ± 8.8  | 874.3 ± 9.0  |
| <i>glp-1(e2141)</i><br>mated   | 40       |                              | 789.6 ± 11.3 | 887.0 ± 5.9  | 892.7 ± 8.1  | 894.0 ± 6.7  | 888.1 ± 10.8 | 868.6 ± 12.0 | 857.5 ± 11.4 |
| @26°C                          |          | <b>p value</b>               | -            | 0.4282       | 0.9083       | 0.9093       | 0.9567       | 0.8173       | 0.2510       |
|                                |          | <b>% change</b>              | -            | 0.8%         | -0.1%        | -0.1%        | -0.1%        | -0.4%        | -1.9%        |

**Table S3. Mated males microarray SAM rank table**

A. up-regulated genes (compared to unmated control)

| Rank | Sequence Name | Gene Name | Ave. fold change | SAM score | Gene description                                                                                                                                                                                                                                                                                                                                                                                                                                                                                                                                                                                                                                                                                                                                                          |
|------|---------------|-----------|------------------|-----------|---------------------------------------------------------------------------------------------------------------------------------------------------------------------------------------------------------------------------------------------------------------------------------------------------------------------------------------------------------------------------------------------------------------------------------------------------------------------------------------------------------------------------------------------------------------------------------------------------------------------------------------------------------------------------------------------------------------------------------------------------------------------------|
| 1    | F59D8.2       | vit-4     | 18.13            | 13.72     | vit-4 is predicted to have lipid transporter activity, based on protein domain information.                                                                                                                                                                                                                                                                                                                                                                                                                                                                                                                                                                                                                                                                               |
| 2    | F59D8.1       | vit-3     | 35.02            | 13.09     | vit-3 encodes a vitellogenin, a precursor of the lipid-binding protein related to vertebrate vitellogenins and mammalian ApoB-100, a core LDL particle constituent (OMIM:107730); VIT-3 is a major yolk component, but as loss of VIT-3 activity via RNA-mediated interference (RNAi) does not result in any abnormalities, VIT-3 likely functions redundantly with other vitellogenins to provide essential nutrients to the developing embryo; VIT-3 is expressed exclusively in the adult hermaphrodite intestine, from which it is secreted into the pseudocoelomic space and finally taken up by oocytes; in males, vit-3 expression may be negatively regulated by MAB-3, a DM binding domain-containing transcription factor required for male sexual development. |
| 3    | C04F6.1       | vit-5     | 13.99            | 11.49     | vit-5 encodes a vitellogenin, a lipid-binding protein precursor related to vertebrate vitellogenins and mammalian ApoB-100, a core LDL particle constituent; by homology, VIT-5 is predicted to function as a lipid transport protein; loss of vit-5 activity via large-scale RNA-mediated interference (RNAi) screens indicates that VIT-5 is required for embryogenesis and normal rates of postembryonic growth; VIT-5 is a major yolk component and is expressed exclusively in the adult hermaphrodite intestine from which it is secreted into the pseudocoelomic space and taken up by oocytes.                                                                                                                                                                    |
| 4    | K12H6.5       | K12H6.5   | 6.62             | 10.59     |                                                                                                                                                                                                                                                                                                                                                                                                                                                                                                                                                                                                                                                                                                                                                                           |
| 5    | K07H8.6       | vit-6     | 21.26            | 10.35     | vit-6 encodes a vitellogenin                                                                                                                                                                                                                                                                                                                                                                                                                                                                                                                                                                                                                                                                                                                                              |

|    |          |          |       |      |                                                                                                                                                                                                                                                                                                                                       |
|----|----------|----------|-------|------|---------------------------------------------------------------------------------------------------------------------------------------------------------------------------------------------------------------------------------------------------------------------------------------------------------------------------------------|
|    |          |          |       |      | precursor protein that is cleaved in the body cavity into two smaller yolk proteins, YP115 and YP88; in <i>C. elegans</i> , vitellogenin genes exhibit stage-, sex-, and tissue-specific expression being expressed exclusively in the adult hermaphrodite intestine.                                                                 |
| 6  | F56H6.2  | F56H6.2  | 4.52  | 8.25 |                                                                                                                                                                                                                                                                                                                                       |
| 7  | Y46H3A.5 | Y46H3A.5 | 4.08  | 8.06 |                                                                                                                                                                                                                                                                                                                                       |
| 8  | C16C8.10 | C16C8.10 | 3.94  | 7.29 |                                                                                                                                                                                                                                                                                                                                       |
| 9  | F56D2.8  | F56D2.8  | 5.03  | 6.73 |                                                                                                                                                                                                                                                                                                                                       |
| 10 | F40G9.15 | F40G9.15 | 3.48  | 6.55 |                                                                                                                                                                                                                                                                                                                                       |
| 11 | C45G7.2  | ilys-2   | 2.85  | 6.28 | ilys-2 is involved in defense response to Gram-positive bacterium; ilys-2 is predicted to have lysozyme activity, based on protein domain information.                                                                                                                                                                                |
| 12 | T10D4.7  | T10D4.7  | 4.01  | 6.27 |                                                                                                                                                                                                                                                                                                                                       |
| 13 | C42D8.2  | vit-2    | 13.96 | 6.22 | vit-2 encodes the vitellogenin homolog YP170; vit-2 is expressed in the adult hermaphrodite intestine and VIT-2 is secreted into the pseudocoelomic space before being taken up by developing oocytes; vit-2 expression is regulated in a sex-, stage-, and tissue-specific manner by the ELT-2/GATA and MAB-3 transcription factors. |
| 14 | C39B5.10 | C39B5.10 | 4.81  | 6.18 |                                                                                                                                                                                                                                                                                                                                       |

#### B. down-regulated genes (compared to unmated control)

| Rank | Sequence Name | Gene Name | Ave. fold change | SAM score | Gene description                                                                                                                                                                                                                                                                                                           |
|------|---------------|-----------|------------------|-----------|----------------------------------------------------------------------------------------------------------------------------------------------------------------------------------------------------------------------------------------------------------------------------------------------------------------------------|
| 1    | F49E11.6      | scl-11    | -23.70           | -15.20    | scl-11 encodes a predicted extracellular protein that is a member of the <i>C. elegans</i> family of SCP/TAPS domain-containing proteins.                                                                                                                                                                                  |
| 2    | R04B5.6       | R04B5.6   | -8.11            | -10.76    | R04B5.6 encodes one of two <i>C. elegans</i> sorbitol dehydrogenase orthologs; by homology the product of R04B5.6 is predicted to catalyze the reversible oxidation of sorbitol to fructose in the presence of NAD <sup>+</sup> ; in the embryo, an R04B5.6::gfp fusion is expressed in pharyngeal cells and head neurons. |
| 3    | ZK355.3       | ZK355.3   | -15.78           | -10.63    |                                                                                                                                                                                                                                                                                                                            |
| 4    | T13B5.5       | lips-11   | -9.76            | -9.88     | lips-11 is predicted to have                                                                                                                                                                                                                                                                                               |

|    |           |          |        |       |                                                                                                                                                                                                                                                                                                                                                                                                                                                                                                                                                                                        |
|----|-----------|----------|--------|-------|----------------------------------------------------------------------------------------------------------------------------------------------------------------------------------------------------------------------------------------------------------------------------------------------------------------------------------------------------------------------------------------------------------------------------------------------------------------------------------------------------------------------------------------------------------------------------------------|
|    |           |          |        |       | hydrolase activity, based on protein domain information.                                                                                                                                                                                                                                                                                                                                                                                                                                                                                                                               |
| 5  | H10D18.2  | scl-12   | -5.82  | -9.38 | scl-12 encodes a predicted extracellular protein that is a member of the C. elegans family of SCP/TAPS domain-containing proteins.                                                                                                                                                                                                                                                                                                                                                                                                                                                     |
| 6  | T13B5.6   | lips-12  | -5.04  | -9.36 | lips-12 is predicted to have hydrolase activity, based on protein domain information.                                                                                                                                                                                                                                                                                                                                                                                                                                                                                                  |
| 7  | Y6E2A.4   | Y6E2A.4  | -5.22  | -9.26 |                                                                                                                                                                                                                                                                                                                                                                                                                                                                                                                                                                                        |
| 8  | K02E7.6   | K02E7.6  | -7.29  | -9.18 |                                                                                                                                                                                                                                                                                                                                                                                                                                                                                                                                                                                        |
| 9  | F56D6.8   | F56D6.8  | -10.08 | -8.80 |                                                                                                                                                                                                                                                                                                                                                                                                                                                                                                                                                                                        |
| 10 | W10G11.15 | clec-129 | -10.03 | -8.00 |                                                                                                                                                                                                                                                                                                                                                                                                                                                                                                                                                                                        |
| 11 | F56D6.9   | F56D6.9  | -22.94 | -7.93 |                                                                                                                                                                                                                                                                                                                                                                                                                                                                                                                                                                                        |
| 12 | F38B6.4   | F38B6.4  | -4.20  | -7.49 | F38B6.4 is an ortholog of human GART (phosphoribosylglycinamide formyltransferase, phosphoribosylglycinamide synthetase, phosphoribosylaminoimidazole synthetase); F38B6.4 is predicted to have phosphoribosylamine-glycine ligase activity, phosphoribosylformylglycinamide cyclo-ligase activity, phosphoribosylglycinamide formyltransferase activity, and ATP binding activity, based on protein domain information.                                                                                                                                                               |
| 13 | Y22F5A.5  | lys-2    | -8.30  | -7.46 | lys-2 is one of ten C. elegans lysozyme genes; as such, lys-2 can be predicted to have a role in lysozymal function including immune function.                                                                                                                                                                                                                                                                                                                                                                                                                                         |
| 14 | T01C3.11  | T01C3.11 | -4.25  | -7.33 |                                                                                                                                                                                                                                                                                                                                                                                                                                                                                                                                                                                        |
| 15 | F46B3.14  | F46B3.14 | -4.45  | -7.16 |                                                                                                                                                                                                                                                                                                                                                                                                                                                                                                                                                                                        |
| 16 | F45D11.4  | F45D11.4 | -4.15  | -6.70 | F45D11.4, with F45D11.2 and F45D11.3, encodes a nematode-specific protein that entirely consists of one large (~300-residue) 'domain of unknown function' (DUF684) that is found in several other C. elegans proteins; a transcription unit of either F45D11.4, F45D11.2, or F45D11.3 (genes of essentially identical sequence) has a natural nonsense transcript that is up-regulated in vivo by smg[-] mutations, indicating that at least one of these three genes is a natural substrate for SMG-mediated nonsense suppression; since several other natural mRNA substrates of SMG |

|    |            |            |       |       |                                                                                                                                                                                                                                                                                                                                                                                                                                       |
|----|------------|------------|-------|-------|---------------------------------------------------------------------------------------------------------------------------------------------------------------------------------------------------------------------------------------------------------------------------------------------------------------------------------------------------------------------------------------------------------------------------------------|
|    |            |            |       |       | suppression (e.g., rpl-3, rpl-8, rpl-10a, rpl-12) have protein products that are involved in translation, F45D11.4 protein may function in translation as well.                                                                                                                                                                                                                                                                       |
| 17 | F58E10.7   | F58E10.7   | -4.01 | -6.33 |                                                                                                                                                                                                                                                                                                                                                                                                                                       |
| 18 | F32B4.6    | F32B4.6    | -7.31 | -6.19 | F32B4.6 is an ortholog of human ABHD11 (abhydrolase domain containing 11).                                                                                                                                                                                                                                                                                                                                                            |
| 19 | Y116A8C.44 | Y116A8C.44 | -5.04 | -6.12 |                                                                                                                                                                                                                                                                                                                                                                                                                                       |
| 20 | C52D10.1   | C52D10.1   | -2.97 | -6.09 |                                                                                                                                                                                                                                                                                                                                                                                                                                       |
| 21 | F36G9.7    | F36G9.7    | -3.71 | -6.06 |                                                                                                                                                                                                                                                                                                                                                                                                                                       |
| 22 | F45D11.15  | F45D11.15  | -7.75 | -6.04 |                                                                                                                                                                                                                                                                                                                                                                                                                                       |
| 23 | EGAP7.1    | dpy-3      | -2.52 | -6.04 | dpy-3 encodes a cuticular collagen; along with dpy-2, dpy-7, dpy-8, and dpy-10, dpy-3 is required postembryonically for annular furrow formation and/or maintenance; specifically, DPY-3 activity is required for proper assembly of the DPY-7 collagen into the mature extracellular matrix; during each cuticle synthetic period, dpy-3 mRNA is expressed approximately four hours prior to the secretion of new cuticle.           |
| 24 | C17B7.12   | C17B7.12   | -3.47 | -6.04 |                                                                                                                                                                                                                                                                                                                                                                                                                                       |
| 25 | C32B5.9    | fbxc-7     | -4.85 | -6.03 |                                                                                                                                                                                                                                                                                                                                                                                                                                       |
| 26 | T13B5.7    | lips-13    | -5.67 | -5.99 | lips-13 is predicted to have hydrolase activity, based on protein domain information.                                                                                                                                                                                                                                                                                                                                                 |
| 27 | F35E8.10   | F35E8.10   | -3.41 | -5.95 |                                                                                                                                                                                                                                                                                                                                                                                                                                       |
| 28 | B0286.3    | B0286.3    | -3.43 | -5.95 | B0286.3 is an ortholog of human PAICS (phosphoribosylaminoimidazole carboxylase, phosphoribosylaminoimidazole succinocarboxamide synthetase); B0286.3 is predicted to have ATP binding activity, based on protein domain information.                                                                                                                                                                                                 |
| 29 | T01B10.1   | grd-4      | -4.72 | -5.91 | grd-4 encodes a hedgehog-like protein, with an N-terminal signal sequence and a C-terminal Ground domain; the Ground domain is predicted to form a cysteine-crosslinked protein involved in intercellular signalling, and it has subtle similarity to the N-terminal Hedge domain of HEDGEHOG proteins; GRD-4 is weakly required for normal molting; GRD-4 is also required for normal adult alae formation, growth to full size, and |

|    |          |          |       |       |                                                                                                                                                                                                                                                                                                                                                                                                                                                                                                                     |
|----|----------|----------|-------|-------|---------------------------------------------------------------------------------------------------------------------------------------------------------------------------------------------------------------------------------------------------------------------------------------------------------------------------------------------------------------------------------------------------------------------------------------------------------------------------------------------------------------------|
|    |          |          |       |       | locomotion; all of these requirements may reflect common defects in cholesterol-dependent hedgehog-like signalling or in vesicle trafficking.                                                                                                                                                                                                                                                                                                                                                                       |
| 30 | T22B7.7  | T22B7.7  | -7.06 | -5.90 | T22B7.7 is an ortholog of human ACOT9 (acyl-CoA thioesterase 9).                                                                                                                                                                                                                                                                                                                                                                                                                                                    |
| 31 | C07A9.9  | C07A9.9  | -3.02 | -5.89 |                                                                                                                                                                                                                                                                                                                                                                                                                                                                                                                     |
| 32 | C48B4.1  | C48B4.1  | -3.08 | -5.82 | C48B4.1 is an ortholog of human ACOX2 (acyl-CoA oxidase 2, branched chain) and ACOX1 (acyl-CoA oxidase 1, palmitoyl); C48B4.1 is predicted to have acyl-CoA dehydrogenase activity, acyl-CoA oxidase activity, and flavin adenine dinucleotide binding activity, based on protein domain information.                                                                                                                                                                                                               |
| 33 | F45D11.1 | F45D11.1 | -5.05 | -5.73 |                                                                                                                                                                                                                                                                                                                                                                                                                                                                                                                     |
| 34 | C03G6.5  | C03G6.5  | -2.73 | -5.70 |                                                                                                                                                                                                                                                                                                                                                                                                                                                                                                                     |
| 35 | C10H11.5 | ugt-27   | -4.36 | -5.65 | ugt-27 is an ortholog of human UGT3A2 (UDP glycosyltransferase 3 family, polypeptide A2) and UGT3A1 (UDP glycosyltransferase 3 family, polypeptide A1); ugt-27 is predicted to have transferase activity, transferring hexosyl groups, based on protein domain information.                                                                                                                                                                                                                                         |
| 36 | C09C7.1  | zig-4    | -2.52 | -5.65 | zig-4 encodes a predicted secreted protein that is a member of the immunoglobulin superfamily of proteins; ZIG-4 activity is required for maintenance of ventral nerve cord organization: the AVKL/R and PVQL/R axons of the left and right ventral nerve cords do not maintain their proper spatial positions and drift into the opposite cord; a zig-4::gfp reporter fusion is expressed in the PVT, ASK, BAG, and M2 neurons, with expression also seen during the L1 stage in pharyngeal mesoderm and ectoderm. |
| 37 | F18E3.12 | F18E3.12 | -3.26 | -5.65 |                                                                                                                                                                                                                                                                                                                                                                                                                                                                                                                     |
| 38 | C33G8.3  | C33G8.3  | -7.08 | -5.62 |                                                                                                                                                                                                                                                                                                                                                                                                                                                                                                                     |
| 39 | C23G10.6 | C23G10.6 | -3.23 | -5.57 | C23G10.6 is an ortholog of human UGT3A2 (UDP glycosyltransferase 3 family, polypeptide A2) and UGT3A1 (UDP glycosyltransferase 3 family, polypeptide A1); C23G10.6 is predicted to have                                                                                                                                                                                                                                                                                                                             |

|    |           |          |       |       |                                                                                         |
|----|-----------|----------|-------|-------|-----------------------------------------------------------------------------------------|
|    |           |          |       |       | transferase activity, transferring hexosyl groups, based on protein domain information. |
| 40 | Y53F4B.32 | gst-29   | -2.79 | -5.54 | gst-29 is an ortholog of human HPGDS (hematopoietic prostaglandin D synthase).          |
| 41 | Y32G9A.5  | Y32G9A.5 | -2.69 | -5.38 |                                                                                         |



**Table S4. List of Chinese Emperors**

|  |                                            |
|--|--------------------------------------------|
|  | Non-promiscuous Emperors, natural death    |
|  | Non-promiscuous Emperors, unnatural causes |
|  | Promiscuous Emperors, natural death        |
|  | Promiscuous Emperors, unnatural causes     |

|    | Name                                    | Age at death | Years of reign | Year of birth - Year of death |
|----|-----------------------------------------|--------------|----------------|-------------------------------|
| 1  | 秦始皇 嬴政 Qin Shi Huang Ying Zheng         | 50           | 37             | 259-210 BC                    |
| 2  | 秦二世 嬴胡亥 Qin Er Shi Ying Huhai           | 24           | 3              | 230-207 BC                    |
| 3  | 汉高祖 刘邦 Han Gao Zu Liu Bang              | 53           | 8              | 247-195 BC                    |
| 4  | 汉惠帝 刘盈 Han Hui Di Liu Ying              | 23           | 7              | 210-188 BC                    |
| 5  | 汉文帝 刘恒 Han Wen Di Liu Heng              | 46           | 23             | 202-157 BC                    |
| 6  | 汉景帝 刘启 Han Jing Di Liu Qi               | 48           | 16             | 188-141 BC                    |
| 7  | 汉武帝 刘彻 Han Wu Di Liu Che                | 70           | 54             | 156-87 BC                     |
| 8  | 汉昭帝 刘弗陵 Han Zhao Di Liu Fuling          | 21           | 13             | 94-74 BC                      |
| 9  | 汉宣帝 刘询 Han Xuan Di Liu Xun              | 45           | 25             | 91-49 BC                      |
| 10 | 汉元帝 刘奭 Han Yuan Di Liu Shi              | 42           | 16             | 74-33 BC                      |
| 11 | 汉成帝 刘骜 Han Cheng Di Liu Ao              | 45           | 26             | 51-7 BC                       |
| 12 | 汉哀帝 刘欣 Han Ai Di Liu Xin                | 26           | 7              | 26-1 BC                       |
| 13 | 新朝 王莽 Xin Chao Wang Mang                | 68           | 15             | 45 BC-23                      |
| 14 | 汉光武帝 刘秀 Han Guang Wu Di Liu Xiu         | 63           | 32             | 6 BC-57                       |
| 15 | 汉明帝 刘庄 Han Ming Di Liu Zhuang           | 48           | 18             | 28-75                         |
| 16 | 汉章帝 刘炆 Han Zhang Di Liu Da              | 32           | 13             | 57-88                         |
| 17 | 汉和帝 刘肇 Han He Di Liu Zhao               | 27           | 17             | 79-105                        |
| 18 | 汉安帝 刘祜 Han An Di Liu Hu                 | 32           | 19             | 94-125                        |
| 19 | 汉顺帝 刘保 Han Shun Di Liu Bao              | 30           | 19             | 115-144                       |
| 20 | 汉桓帝 刘志 Han Huan Di Liu Zhi              | 36           | 21             | 132-167                       |
| 21 | 汉灵帝 刘宏 Han Ling Di Liu Hong             | 34           | 22             | 156-189                       |
| 22 | 汉献帝 刘协 Han Xian Di Liu Xie              | 54           | 31             | 181-234                       |
| 23 | 汉昭烈帝 刘备 Han Zhao Lie Di Liu Bei         | 63           | 3              | 161-223                       |
| 24 | 蜀汉后主 刘禅 Shu Han Hou Zhu Liu Shan        | 65           | 40             | 207-271                       |
| 25 | 魏文帝 曹丕 Wei Wen Di Cao Pi                | 40           | 7              | 187-226                       |
| 26 | 魏明帝 曹叡 Wei Ming Di Cao Rui              | 34           | 13             | 205-239                       |
| 27 | 魏齐王 曹芳 Wei Qi Wang Cao Fang             | 43           | 15             | 232-274                       |
| 28 | 魏高贵乡公 曹髦 Wei Gao Gui Xiang Gong Cao Mao | 20           | 6              | 241-260                       |
| 29 | 魏元帝 曹奂 Wei Yuan Di Cao Huan             | 58           | 5              | 245-302                       |
| 30 | 吴大帝 孙权 Wu Da Di Sun Quan                | 71           | 24             | 182-252                       |
| 31 | 吴废帝 孙亮 Wu Fei Di Sun Liang              | 18           | 6              | 243-260                       |
| 32 | 吴景帝 孙休 Wu Jing Di Sun Xiu               | 30           | 6              | 235-264                       |
| 33 | 吴末帝 孙皓 Wu Mo Di Sun Hao                 | 43           | 16             | 242-284                       |
| 34 | 晋武帝 司马炎 Jin Wu Di Sima Yan              | 55           | 25             | 236-290                       |
| 35 | 晋惠帝 司马衷 Jin Hui Di Sima Zhong           | 48           | 16             | 259-307                       |
| 36 | 晋怀帝 司马炽 Jin Huai Di Sima Chi            | 30           | 5              | 284-313                       |
| 37 | 晋愍帝 司马邺 Jin Min Di Sima Ye              | 18           | 4              | 300-317                       |
| 38 | 晋元帝 司马睿 Jin Yuan Di Sima Yuan           | 47           | 5              | 276-323                       |
| 39 | 晋明帝 司马绍 Jin Ming Di Sima Shao           | 27           | 3              | 299-325                       |
| 40 | 晋成帝 司马衍 Jin Cheng Di Sima Yan           | 22           | 17             | 321-342                       |
| 41 | 晋康帝 司马岳 Jin Kang Di Sima Yue            | 23           | 2              | 322-344                       |
| 42 | 晋穆帝 司马聃 Jin Mu Di Sima Dan              | 19           | 17             | 343-361                       |

|    |                                             |    |    |         |
|----|---------------------------------------------|----|----|---------|
| 43 | 晋哀帝 司马丕 Jin Ai Di Sima Pi                   | 25 | 4  | 341-365 |
| 44 | 晋废帝 司马奕 Jin Fei Di Sima Yi                  | 45 | 6  | 342-286 |
| 45 | 晋简文帝 司马昱 Jin Jian Wen Di Sima Yu            | 52 | 1  | 321-372 |
| 46 | 晋孝武帝 司马曜 Jin Xiao Wu Di Sima Yao            | 35 | 24 | 362-396 |
| 47 | 晋安帝 司马德宗 Jin An Di Sima Dezhong             | 37 | 22 | 382-418 |
| 48 | 晋恭帝 司马德文 Jin Gong Di Sima Dewen             | 37 | 2  | 385-421 |
| 49 | 楚武悼帝 桓玄 Chu Wu Dao Di Huan Xuan             | 36 | 1  | 369-404 |
| 50 | 成武帝 李雄 Cheng Wu Di Li Xiong                 | 61 | 30 | 274-334 |
| 51 | 成幽公 李期 Cheng You Gong Li Qi                 | 26 | 4  | 314-338 |
| 52 | 汉昭文帝 李寿 Han Zhao Wen Di Li Shou             | 44 | 7  | 300-343 |
| 53 | 后赵明帝 石勒 Hou Zhao Ming Di Shi Le             | 60 | 15 | 274-333 |
| 54 | 后赵海阳王 石弘 Hou Zhao Hai Yang Wang Shi Hong    | 22 | 1  | 314-335 |
| 55 | 后赵武帝 石虎 Hou Zhao Wu Di Shi Hu               | 55 | 15 | 295-349 |
| 56 | 前燕文明帝 慕容皝 Qian Yan Wen Ming Di Murong Huang | 52 | 12 | 297-348 |
| 57 | 前燕景昭帝 慕容儁 Qian Yan Jing Zhao Di Murong Jun  | 42 | 12 | 319-360 |
| 58 | 前燕幽帝 慕容暉 Qian Yan You Di Murong Wei         | 35 | 10 | 350-384 |
| 59 | 西燕威帝 慕容冲 Xi Yan Wei Di Murong Chong         | 28 | 1  | 359-386 |
| 60 | 后燕成武帝 慕容垂 Hou Yan Cheng Wu Di Murong Chui   | 71 | 12 | 326-396 |
| 61 | 后燕惠愍帝 慕容宝 Hou Yan Hui Min Di Murong Bao     | 44 | 2  | 355-398 |
| 62 | 后燕昭武帝 慕容盛 Hou Yan Zhao Wu Di Murong Sheng   | 29 | 3  | 373-401 |
| 63 | 后燕昭文帝 慕容熙 Hou Yan Zhao Wen Di Murong Xi     | 23 | 6  | 385-407 |
| 64 | 南燕献武帝 慕容德 Nan Yan Xian Wu Di Murong De      | 70 | 7  | 336-405 |
| 65 | 南燕末主 慕容超 Nan Yan Hou Zhu Murong Chao        | 26 | 5  | 385-410 |
| 66 | 后凉懿武帝 吕光 Hou Liang Yi Wu Wang Lv Guang      | 62 | 13 | 338-399 |
| 67 | 前秦惠武帝 苻洪 Qian Qin Hui Wu Di Fu Hong         | 66 | 1  | 285-350 |
| 68 | 前秦明帝 苻健 Qian Qin Ming Di Fu Jian            | 39 | 5  | 317-355 |
| 69 | 前秦厉王 苻生 Qian Qin Li Wang Fu Sheng           | 23 | 2  | 335-357 |
| 70 | 前秦宣昭帝 苻坚 Qian Qin Xuan Zhao Di Fu Jian      | 48 | 28 | 338-385 |
| 71 | 前秦高帝 苻登 Qian Qin Gao Di Fu Deng             | 52 | 8  | 343-394 |
| 72 | 后秦武昭帝 姚苻 Hou Qin Wu Zhao Di Yao Chang       | 64 | 9  | 330-393 |
| 73 | 后秦文桓帝 姚兴 Hou Qin Wen Huan Di Yao Xing       | 51 | 23 | 366-416 |
| 74 | 后秦末主 姚泓 Hou Qin Mo Zhu Yao Hong             | 30 | 1  | 388-417 |
| 75 | 夏武烈帝 赫连勃勃 Xia Wu Lie Di Helian Bobo         | 45 | 18 | 381-425 |
| 76 | 宋武帝 刘裕 Song Wu Di Liu Yu                    | 60 | 2  | 363-422 |
| 77 | 宋少帝 刘义符 Song Shao Di Liu Yifu               | 19 | 2  | 406-424 |
| 78 | 宋文帝 刘义隆 Song Wen Di Liu Yilong              | 47 | 29 | 407-453 |
| 79 | 宋孝武帝 刘骏 Song Xiao Wu Di Liu Jun             | 35 | 11 | 430-464 |
| 80 | 宋明帝 刘彧 Song Ming Di Liu Yu                  | 34 | 7  | 439-472 |
| 81 | 齐高帝 萧道成 Qi Gao Di Xiao Daocheng             | 56 | 4  | 427-482 |
| 82 | 齐武帝 萧赜 Qi Wu Di Xiao Ze                     | 54 | 11 | 440-493 |
| 83 | 齐郁林王 萧昭业 Qi Yu Lin Wang Xiao Zhaoye         | 22 | 1  | 473-494 |
| 84 | 齐明帝 萧鸾 Qi Ming Di Xiao Luan                 | 47 | 4  | 452-498 |
| 85 | 齐东昏侯 萧宝卷 Qi Dong Hun Gou Xiao Baojuan       | 19 | 3  | 483-501 |
| 86 | 梁武帝 萧衍 Liang Wu Di Xiao Yan                 | 86 | 48 | 464-549 |
| 87 | 梁简文帝 萧纲 Liang Jian Wen Di Xiao Gang         | 49 | 2  | 503-551 |
| 88 | 梁元帝 萧绎 Liang Yuan Di Xiao Yi                | 47 | 3  | 508-554 |
| 89 | 梁宣帝 萧誉 Liang Xuan Di Xiao Cha               | 44 | 8  | 519-562 |
| 90 | 梁明帝 萧岿 Liang Ming Di Xiao Kui               | 44 | 23 | 542-585 |
| 91 | 陈武帝 陈霸先 Chen Wu Di Chen Baxian              | 57 | 3  | 503-559 |
| 92 | 陈文帝 陈蒨 Chen Wen Di Chen Qian                | 45 | 7  | 522-566 |
| 93 | 陈宣帝 陈顼 Chen Xuan Di Chen Xu                 | 53 | 14 | 530-582 |
| 94 | 陈后主 陈叔宝 Chen Hou Zhu Chen Shubao            | 52 | 7  | 553-604 |

|     |                                               |    |    |         |
|-----|-----------------------------------------------|----|----|---------|
| 95  | 北魏道武帝 拓跋珪 Bei Wei Dao Wu Di Tuoba Gui         | 39 | 24 | 371-409 |
| 96  | 北魏明元帝 拓跋嗣 Bei Wei Ming Yuan Di Tuoba Si       | 32 | 14 | 392-423 |
| 97  | 北魏太武帝 拓跋焘 Bei Wei Tai Wu Di Tuoba Tao         | 45 | 29 | 408-452 |
| 98  | 北魏文成帝 拓跋濬 Bei Wei Wen Cheng Di Tuoba Jun      | 26 | 13 | 440-465 |
| 99  | 北魏献文帝 拓跋弘 Bei Wei Xian Wen Di Tuoba Hong      | 23 | 11 | 454-476 |
| 100 | 北魏孝文帝 元宏 Bei Wei Xiao Wen Di Yuan Hong        | 33 | 23 | 467-499 |
| 101 | 北魏宣武帝 元恪 Bei Wei Xiao Wu Di Yuan Ke           | 33 | 16 | 463-515 |
| 102 | 北魏孝明帝 元诩 Bei Wei Xiao Ming Di Yuan Xu         | 19 | 13 | 510-528 |
| 103 | 北魏孝庄帝 元子攸 Bei Wei Xiao Zhuang Di Yuan Ziyou   | 24 | 2  | 507-530 |
| 104 | 北魏节闵帝 元恭 Bei Wei Jie Min Di Yuan Gong         | 35 | 1  | 498-532 |
| 105 | 北魏安定王 元朗 Bei Wei An Ding Wang Yuan Lang       | 20 | 1  | 513-532 |
| 106 | 北魏孝武帝 元修 Bei Wei Xiao Wu Di Yuan Xiu          | 25 | 2  | 510-534 |
| 107 | 东魏孝静帝 元善见 Dong Wei Xiao Jing Di Yuan Jianshan | 28 | 17 | 524-551 |
| 108 | 西魏文帝 元宝炬 Xi Wei Wen Di Yuan Baoju             | 45 | 17 | 507-551 |
| 109 | 西魏恭帝 拓跋廓 Xi Wei Gong Di Tuoba Kuo             | 21 | 3  | 537-557 |
| 110 | 北齐文宣帝 高洋 Bei Qi Wen Xuan Di Gao Yang          | 31 | 10 | 529-559 |
| 111 | 北齐孝昭帝 高演 Bei Qi Xiao Zhao Di Gao Yan          | 27 | 1  | 535-561 |
| 112 | 北齐武成帝 高湛 Bei Qi Wu Cheng Di Gao Dan           | 32 | 4  | 537-568 |
| 113 | 北齐后主 高纬 Bei Qi Hou Zhu Gao Wei                | 21 | 12 | 556-577 |
| 114 | 北周明帝 宇文毓 Bei Zhou Ming Di Yuwen Yu            | 27 | 3  | 534-560 |
| 115 | 北周武帝 宇文邕 Bei Zhou Wu Di Yuwen Yong            | 36 | 18 | 543-578 |
| 116 | 北周宣帝 宇文赟 Bei Zhou Xuan Di Yuwen Yun           | 22 | 1  | 559-580 |
| 117 | 隋文帝 杨坚 Sui Wen Di Yang Jian                   | 64 | 24 | 541-604 |
| 118 | 隋炀帝 杨广 Sui Yang Di Yang Guang                 | 50 | 14 | 569-618 |
| 119 | 唐高祖 李渊 Tang Gao Zu Li Yuan                    | 70 | 9  | 566-635 |
| 120 | 唐太宗 李世民 Tang Tai Zong Li Shiming              | 53 | 23 | 597-649 |
| 121 | 唐高宗 李治 Tang Gao Zong Li Zhi                   | 56 | 34 | 628-683 |
| 122 | 武则天 武曌 Wu Ze Tian Wu Zhao                     | 82 | 15 | 624-705 |
| 123 | 唐中宗 李显 Tang Zhong Zong Li Xian                | 56 | 6  | 656-710 |
| 124 | 唐睿宗 李旦 Tang Rui Zong Li Dan                   | 55 | 8  | 662-716 |
| 125 | 唐玄宗 李隆基 Tang Xuan Zong Li Longji              | 78 | 44 | 685-762 |
| 126 | 唐肃宗 李亨 Tang Su Zong Li Heng                   | 52 | 6  | 711-762 |
| 127 | 唐代宗 李豫 Tang Dai Zong Li Yu                    | 54 | 17 | 726-779 |
| 128 | 唐德宗 李适 Tang De Zong Li Shi                    | 64 | 26 | 742-805 |
| 129 | 唐顺宗 李诵 Tang Shun Zong Li Song                 | 46 | 1  | 761-806 |
| 130 | 唐宪宗 李纯 Tang Xian Zong Li Chun                 | 43 | 15 | 778-820 |
| 131 | 唐穆宗 李恒 Tang Mu Zong Li Heng                   | 30 | 4  | 795-824 |
| 132 | 唐敬宗 李湛 Tang Jing Zong Li Zhan                 | 18 | 2  | 809-826 |
| 133 | 唐文宗 李昂 Tang Wen Zong Li Ang                   | 32 | 14 | 809-840 |
| 134 | 唐武宗 李炎 Tang Wu Zong Li Yan                    | 33 | 6  | 814-846 |
| 135 | 唐宣宗 李忱 Tang Xuan Zong Li Chen                 | 50 | 13 | 810-859 |
| 136 | 唐懿宗 李漼 Tang Yi Zong Li Cui                    | 41 | 14 | 833-873 |
| 137 | 唐僖宗 李儇 Tang Xi Zong Li Xuan                   | 27 | 15 | 862-888 |
| 138 | 唐昭宗 李晔 Tang Zhao Zong Li Ye                   | 38 | 16 | 867-904 |
| 139 | 后梁太祖 朱温 Hou Liang Tai Zu Zhu Wen              | 61 | 6  | 852-912 |
| 140 | 后梁郢王 朱友珪 Hou Liang Ying Wang Zhu Yougui       | 30 | 1  | 884-913 |
| 141 | 后梁末帝 朱友贞 Hou Liang Mo Di Zhu Youzhen          | 36 | 10 | 888-923 |
| 142 | 后唐庄宗 李存勖 Hou Tang Zhuang Zong Li Cunxu        | 42 | 4  | 885-926 |
| 143 | 后唐明宗 李嗣源 Hou Tang Ming Zong Li Siyuan         | 67 | 7  | 867-933 |
| 144 | 后唐闵帝 李从厚 Hou Tang Min Di Li Conghou           | 21 | 1  | 914-934 |
| 145 | 后唐末帝 李从珂 Hou Tang Mo Di Li Congke             | 52 | 2  | 885-936 |
| 146 | 后晋高祖 石敬瑭 Hou Jin Gao Zu Shi Jingtang          | 51 | 6  | 892-942 |

|     |                                       |    |    |           |
|-----|---------------------------------------|----|----|-----------|
| 147 | 后晋出帝 石重贵 Hou Jin Chu Di Shi Chonggui  | 61 | 4  | 914-974   |
| 148 | 后汉高祖 刘知远 Hou Han Gao Zu Liu Zhiyuan   | 54 | 1  | 895-948   |
| 149 | 后汉隐帝 刘承祐 Hou Han Yin Di Liu Chengyou  | 20 | 2  | 931-950   |
| 150 | 北汉世祖 刘崇 Bei Han Shi Zu Liu Chong      | 60 | 4  | 895-954   |
| 151 | 北汉睿宗 刘钧 Bei Han Rui Zong Liu Jun      | 43 | 14 | 926-968   |
| 152 | 后周太祖 郭威 Hou Zhou Tai Zu Guo Wei       | 51 | 4  | 904-954   |
| 153 | 后周世宗 柴荣 Hou Zhou Shi Zong Chai Rong   | 39 | 5  | 921-959   |
| 154 | 吴太祖 杨行密 Wu Tai Zu Yang Xingmi         | 54 | 4  | 852-905   |
| 155 | 吴烈祖 杨渥 Wu Lie Zu Yang Wo              | 23 | 3  | 886-908   |
| 156 | 吴高祖 杨隆演 Wu Gao Zu Yang Longyan        | 24 | 12 | 897-920   |
| 157 | 吴睿帝 杨溥 Wu Rui Di Yang Pu              | 38 | 17 | 900-937   |
| 158 | 南唐烈祖 李昇 Nan Tang Lie Zu Li Bian       | 56 | 6  | 888=943   |
| 159 | 南唐元宗 李璟 Nan Tang Yuan Zong Li Jing    | 46 | 8  | 916-961   |
| 160 | 南唐后主 李煜 Nan Tang Hou Zhu Li Yu        | 42 | 17 | 937-978   |
| 161 | 南汉高祖 刘岩 Nan Han Gao Zu Liu Yan        | 54 | 31 | 889-942   |
| 162 | 南汉殇帝 刘玢 Nan Han Shang Di Liu Bin      | 24 | 1  | 920-943   |
| 163 | 南汉中宗 刘晟 Nan Han Zhong Zong Liu Sheng  | 39 | 15 | 920-958   |
| 164 | 南汉后主 刘鋹 Nan Han Hou Zhu Liu Chang     | 38 | 13 | 943-980   |
| 165 | 前蜀高祖 王建 Qian Shu Gao Zu Wang Jian     | 72 | 18 | 847-918   |
| 166 | 前蜀后主 王衍 Qian Shu Hou Zhu Wang Yan     | 28 | 8  | 899-926   |
| 167 | 后蜀高祖 孟知祥 Hou Shu Gao Zu Meng Zhixiang | 61 | 1  | 874-934   |
| 168 | 后蜀后主 孟昶 Hou Shu Hou Zhu Meng Chang    | 47 | 31 | 919-965   |
| 169 | 宋太祖 赵匡胤 Song Tai Zu Zhao Kuangyin     | 50 | 17 | 927-976   |
| 170 | 宋太宗 赵光义 Song Tai Zong Zhao Guangyi    | 59 | 21 | 939-997   |
| 171 | 宋真宗 赵恒 Song Zhen Zong Zhao Heng       | 55 | 25 | 968-1022  |
| 172 | 宋仁宗 赵祯 Song Ren Zong Zhao Zhen        | 54 | 41 | 1010-1063 |
| 173 | 宋英宗 赵曙 Song Ying Zong Zhao Shu        | 36 | 4  | 1032-1067 |
| 174 | 宋神宗 赵顼 Song Shen Zong Zhao Xu         | 38 | 18 | 1048-1085 |
| 175 | 宋哲宗 赵煦 Song Zhe Zong Zhao Xu          | 25 | 15 | 1076-1100 |
| 176 | 宋徽宗 赵佶 Song Hui Zong Zhao Ji          | 54 | 25 | 1082-1135 |
| 177 | 宋钦宗 赵桓 Song Qin Zong Zhao Huan        | 57 | 2  | 1100-1156 |
| 178 | 宋高宗 赵构 Song Gao Zong Zhao Gou         | 81 | 35 | 1107-1187 |
| 179 | 宋孝宗 赵昚 Song Xiao Zong Zhao Shen       | 68 | 27 | 1127-1194 |
| 180 | 宋光宗 赵惇 Song Guang Zong Zhao Dun       | 54 | 5  | 1147-1200 |
| 181 | 宋宁宗 赵扩 Song Ning Zong Zhao Kuo        | 57 | 30 | 1168-1224 |
| 182 | 宋理宗 赵昀 Song Li Zong Zhao Yun          | 60 | 40 | 1205-1264 |
| 183 | 宋度宗 赵禔 Song Du Zong Zhao Qi           | 35 | 10 | 1240-1274 |
| 184 | 宋恭帝 赵昀 Song Gong Zong Zhao Xian       | 53 | 2  | 1271-1323 |
| 185 | 辽太祖 耶律阿保机 Liao Tai Zu Yelv Abaoji     | 55 | 11 | 872-926   |
| 186 | 辽太宗 耶律德光 Liao Tai Zong Yelv Deguang   | 46 | 21 | 902-947   |
| 187 | 辽世宗 耶律阮 Liao Shi Zong Yelv Ruan       | 34 | 4  | 918-951   |
| 188 | 辽穆宗 耶律璟 Liao Mu Zong Yelv Jing        | 39 | 18 | 931-969   |
| 189 | 辽景宗 耶律贤 Liao Jing Zong Yelv Xian      | 35 | 13 | 948-982   |
| 190 | 辽圣宗 耶律隆绪 Liao Sheng Zong Yelv Longxu  | 61 | 49 | 971-1031  |
| 191 | 辽兴宗 耶律宗真 Liao Xing Zong Yelv Zongzhen | 40 | 24 | 1016-1055 |
| 192 | 辽道宗 耶律洪基 Liao Dao Zong Yelv Hongji    | 70 | 46 | 1032-1101 |
| 193 | 辽天祚帝 耶律延禧 Liao Tian Zuo Di Yelv Yanxi | 54 | 24 | 1075-1128 |
| 194 | 辽宣宗 耶律淳 Liao Xuan Zong Yelv Chun      | 61 | 1  | 1062-1122 |
| 195 | 辽德宗 耶律大石 Liao De Zong Yelv Dashi      | 57 | 12 | 1087-1143 |
| 196 | 金太祖 完颜阿骨打 Jin Tai Zu Wanyan Aguda     | 56 | 9  | 1068-1123 |
| 197 | 金太宗 完颜晟 Jin Tai Zong Wanyan Sheng     | 61 | 12 | 1075-1135 |
| 198 | 金熙宗 完颜亶 Jin Xi Zong Wanyan Dan        | 31 | 14 | 1119-1149 |

|     |                                                |    |    |           |
|-----|------------------------------------------------|----|----|-----------|
| 199 | 金海陵王 完颜亮 Jin Hai Ling Wang Wanyan Liang        | 40 | 12 | 1122-1161 |
| 200 | 金世宗 完颜雍 Jin Shi Zong Wanyan Yong               | 67 | 28 | 1123-1189 |
| 201 | 金章宗 完颜璟 Jin Zhang Zong Wanyan Jing             | 41 | 19 | 1168-1208 |
| 202 | 金卫绍王 完颜永济 Jin Wei Shao Wang Wanyan Yongji      | 61 | 5  | 1153-1213 |
| 203 | 金宣宗 完颜珣 Jin Xuan Zong Wanyan Xun               | 61 | 10 | 1163-1223 |
| 204 | 金哀宗 完颜守绪 Jin Ai Zong Wanyan Shouxu             | 37 | 11 | 1198-1234 |
| 205 | 夏景宗 李元昊 Xia Jing Zong Li Yuanhao               | 46 | 17 | 1003-1048 |
| 206 | 夏毅宗 李谅祚 Xia Yi Zong Li Liangzuo                | 21 | 19 | 1047-1067 |
| 207 | 夏惠宗 李秉常 Xia Hui Zong Li Bingchang              | 26 | 19 | 1061-1086 |
| 208 | 夏崇宗 李乾顺 Xia Chong Zong Li Qianshun             | 57 | 53 | 1083-1139 |
| 209 | 夏仁宗 李仁孝 Xia Ren Zong Li Renxiao                | 70 | 54 | 1124-1193 |
| 210 | 夏桓宗 李纯祐 Xia Huan Zong Li Chunyou               | 30 | 13 | 1177-1206 |
| 211 | 夏襄宗 李安全 Xia Xiang Zong Li Anquan               | 42 | 5  | 1170-1211 |
| 212 | 夏神宗 李遵頊 Xia Shen Zong Li Zunxu                 | 64 | 12 | 1163-1226 |
| 213 | 夏献宗 李德旺 Xia Xian Zong Li Dewang                | 46 | 3  | 1181-1226 |
| 214 | 元太祖 铁木真 Yuan Taizu Tie Mu Zhen                 | 66 | 22 | 1162-1227 |
| 215 | 元睿宗 拖雷 Yuan Rui Zong Tuo Lei                   | 41 | 2  | 1192-1232 |
| 216 | 元太宗 窝阔台 Yuan Tai Zong Wo Kuo Tai               | 56 | 13 | 1186-1241 |
| 217 | 元定宗 贵由 Yuan Ding Zong Gui You                  | 43 | 3  | 1206-1248 |
| 218 | 元宪宗 蒙哥 Yuan Xian Zong Meng Ge                  | 52 | 9  | 1208-1259 |
| 219 | 元世祖 忽必烈 Yuan Shi Zu Hu Bi Lie                  | 79 | 35 | 1215-1294 |
| 220 | 元成宗 铁穆耳 Yuan Cheng Zong Tie Mu Er              | 43 | 13 | 1265-1307 |
| 221 | 元武宗 海山 Yuan Wu Zong Hai Shan                   | 31 | 4  | 1281-1311 |
| 222 | 元仁宗 爱育黎拔力八达 Yuan Ren Zong Aiyulibalibada       | 36 | 9  | 1285-1320 |
| 223 | 元英宗 硕德八剌 Yuan Ying Zong Shuo De Ba La          | 21 | 3  | 1303-1323 |
| 224 | 元泰定帝 也孙铁木儿 Yuan Tai Ding Di Ye Sun Tie Mu Er   | 36 | 5  | 1293-1328 |
| 225 | 元文宗 图帖睦尔 Yuan Wen Zong Tu Tie Mu Er            | 29 | 4  | 1304-1332 |
| 226 | 元明宗 和世㻋 Yuan Ming Zong He Shi La               | 30 | 1  | 1300-1329 |
| 227 | 元惠宗 妥懽帖睦尔 Yuan Hui Zong Tuo Huan Tie Mu Er     | 51 | 38 | 1320-1370 |
| 228 | 元昭宗 爱猷识理达腊 Yuan Zhao Zong Ai Yu Shi Li Da La   | 40 | 8  | 1339-1378 |
| 229 | 元天元帝 脱古思帖木儿 Yuan Tian Yuan Di Tuogusi Tie MuEr | 47 | 10 | 1342-1388 |
| 230 | 明太祖 朱元璋 Ming Tai Zu Zhu Yuanzhang              | 71 | 31 | 1328-1398 |
| 231 | 明惠宗 朱允炆 Ming Hui Zong Zhu Yunwen               | 26 | 4  | 1377-1402 |
| 232 | 明成祖 朱棣 Ming Cheng Zu Zhu Di                    | 65 | 22 | 1360-1424 |
| 233 | 明仁宗 朱高炽 Ming Ren Zong Zhu Gao Chi              | 48 | 1  | 1378-1425 |
| 234 | 明宣宗 朱瞻基 Ming Xuan Zong Zhu Zhan Ji             | 38 | 10 | 1398-1435 |
| 235 | 明英宗 朱祁镇 Ming Ying Zong Zhu Qizhen              | 38 | 22 | 1427-1464 |
| 236 | 明代宗 朱祁钰 Ming Dai Zong Zhu Qiyu                 | 30 | 7  | 1428-1457 |
| 237 | 明宪宗 朱见深 Ming Xian Zong Zhu Jianshen            | 41 | 23 | 1447-1487 |
| 238 | 明孝宗 朱祐樞 Ming Xiao Zong Zhu Youtang             | 36 | 18 | 1470-1505 |
| 239 | 明武宗 朱厚照 Ming Wu Zong Zhu Houzhao               | 31 | 16 | 1491-1521 |
| 240 | 明世宗 朱厚熜 Ming Shi Zong Zhu Houcong              | 60 | 45 | 1507-1567 |
| 241 | 明穆宗 朱载坫 Ming Mu Zong Zhu Zaihou                | 36 | 6  | 1537-1572 |
| 242 | 明神宗 朱翊钧 Ming Shen Zong Zhu Yijun               | 58 | 48 | 1563-1620 |
| 243 | 明熹宗 朱由校 Ming Xi Zong Zhu Youjiao               | 23 | 7  | 1605-1627 |
| 244 | 明思宗 朱由检 Ming Si Zong Zhu Youjian               | 35 | 17 | 1610-1644 |
| 245 | 清太祖 努尔哈赤 Qing Tai Zu Nu Er Ha Chi              | 68 | 11 | 1559-1626 |
| 246 | 清太宗 皇太极 Qing Tai Zong Huang Tai Ji             | 52 | 17 | 1592-1643 |
| 247 | 清世祖 福临 Qing Shi Zu Fu Lin                      | 24 | 18 | 1638-1661 |
| 248 | 清圣祖 玄烨 Qing Sheng Zu Xuan Ye                   | 69 | 61 | 1654-1722 |
| 249 | 清世宗 胤禛 Qing Shi Zong Yin Zhen                  | 58 | 13 | 1678-1735 |
| 250 | 清高宗 弘历 Qing Gao Zong Hong Li                   | 89 | 60 | 1711-1799 |

|     |                                |    |    |           |
|-----|--------------------------------|----|----|-----------|
| 251 | 清仁宗 颙琰 Qing Ren Zong Yong Yan  | 61 | 25 | 1760-1820 |
| 252 | 清宣宗 旻宁 Qing Xuan Zong Min Ning | 69 | 30 | 1782-1850 |
| 253 | 清文宗 奕訢 Qing Wen Zong Yi Zhu    | 31 | 11 | 1831-1861 |
| 254 | 清穆宗 载淳 Qing Mu Zong Zai Chun   | 19 | 13 | 1856-1874 |
| 255 | 清德宗 载湉 Qing De Zong Zai Tian   | 38 | 34 | 1871-1908 |
